# Supplementary material
Source: PubMed Central journal article supplement (PMC7092742)

## ONLINE APPENDIX

In this online appendix, we provide details on methodology and data sources used for the estimation of the costs of stroke in 32 European countries as well as more detailed results.

### Table of contents

|                                              |           |
|----------------------------------------------|-----------|
| <b>METHODS</b>                               | <b>2</b>  |
| Primary, outpatient and emergency healthcare | 2         |
| Hospital inpatient care                      | 5         |
| Healthcare unit costs                        | 5         |
| Pharmaceutical expenditure                   | 5         |
| Social care                                  | 6         |
| Informal care                                | 9         |
| Morbidity losses                             | 11        |
| Mortality losses                             | 15        |
| References                                   | 15        |
| <b>RESULTS</b>                               | <b>26</b> |

## METHODS

### Primary, outpatient and emergency care

Primary care activities consisted of stroke-related visits to or from general practitioners (GPs).

Outpatient care comprised specialist consultations taking place in outpatient wards, clinics, or patients' homes due to stroke. Accident and emergency (A&E) consisted of all stroke-related hospital emergency visits.

**Table A1.** Sources of healthcare resource use by category and country

|                    | Primary care | Outpatient care | A&E      | Inpatient care |
|--------------------|--------------|-----------------|----------|----------------|
| <b>Austria</b>     | 1            | 1               | 2        | 1              |
| <b>Belgium</b>     | 3            | 4               | 4        | 1              |
| <b>Bulgaria</b>    | 1            | 1               | 5        | 1              |
| <b>Croatia</b>     | 6            | 6               | 6        | 1              |
| <b>Cyprus</b>      | 7            | 7               | 7        | 1              |
| <b>Czech Rep.</b>  | 8            | 9               | 10       | 1              |
| <b>Denmark</b>     | 11           | 12              | 13       | 1              |
| <b>Estonia</b>     | 14           | 14              | 14       | 1              |
| <b>Finland</b>     | 15           | 15              | 15       | 1              |
| <b>France</b>      | 16           | 16              | 17       | 1              |
| <b>Germany</b>     | 1            | 1               | 18       | 1              |
| <b>Greece</b>      | 19           | 19              | 18       | 1              |
| <b>Hungary</b>     | 20           | 21              | 22       | 1              |
| <b>Iceland</b>     | 23           | 24              | 13       | 1              |
| <b>Ireland</b>     | 1            | 1               | 25       | 1              |
| <b>Israel</b>      | 26           | 26              | 18       | 27             |
| <b>Italy</b>       | 1            | 1               | 28       | 1              |
| <b>Latvia</b>      | 29           | 29              | 30       | 1              |
| <b>Lithuania</b>   | 31           | 31              | 32       | 1              |
| <b>Luxembourg</b>  | 33           | 33              | 4        | 1              |
| <b>Malta</b>       | 34           | 34              | 34       | 1              |
| <b>Netherlands</b> | 35           | 35              | 36       | 1              |
| <b>Norway</b>      | 37           | 38              | 39       | 1              |
| <b>Poland</b>      | 40           | 40              | 40       | 1              |
| <b>Portugal</b>    | 1            | 41              | 41       | 1              |
| <b>Romania</b>     | 42           | 42              | 43       | 1              |
| <b>Slovakia</b>    | 44           | 44              | 44       | 1              |
| <b>Slovenia</b>    | 45           | 45              | 6        | 1              |
| <b>Spain</b>       | 46           | 47              | 47       | 1              |
| <b>Sweden</b>      | 48           | 48              | 49       | 1              |
| <b>Switzerland</b> | 50           | 50              | 51 52    | 1              |
| <b>UK</b>          | 53 54        | 55-58           | 55 59-61 | 1              |

Country-specific overall visits to primary and outpatient care due to all conditions were obtained for all countries (**Table A1**). In four countries (Iceland, Israel, Luxembourg, Slovenia) we found no data on A&E activity. As a result, we used the total per capita A&E visits from similar countries. Therefore, for:

1) Iceland we used estimates from Denmark;<sup>13</sup>

2) Israel we used estimates from Greece;<sup>18</sup>

3) Luxembourg we used estimates from Belgium;<sup>4</sup> and

4) Slovenia we used estimates from Croatia.<sup>6</sup>

To the total number of primary, outpatient and A&E visits, we determined the number of visits for those under and above the age of 50. Wherever possible, this was obtained from the same sources used to identify all-cause resource use. If this was not available, we obtained the proportion of primary and outpatient care visits in those aged 50 years and above using data from EUROSTAT,<sup>1</sup> which contained self-reported number of primary and outpatient care visits by age. For A&E, when visits were not reported by age group, we used the proportion of all hospital discharges for those aged over 50 years.<sup>1</sup> To obtain the proportion of primary, outpatient and A&E visits due to stroke in those under the age of 50, we estimated the under 50 proportion of overall hospital discharges due to stroke<sup>1</sup>, and applied it to the total number of visits for survivors under the age of 50.

For patients over the age of 50, we used data from the Survey of Health, Ageing and Retirement in Europe (SHARE).<sup>62</sup> SHARE is a multidisciplinary and cross-national panel database of micro data on health, socio-economic status and social and family networks, freely available to researchers, in which all data are collected via face-to-face, computer-aided personal interviews, supplemented by self-completion paper and pencil questionnaires (**Table A2**). The SHARE target population consists of all persons aged 50 years and over who have their regular domicile in the respective SHARE country. Persons are excluded if they are incarcerated, hospitalized or out of the country during the entire survey period, unable to speak the country's language or have moved to an unknown address.

**Table A2.** WAVES and Field time available in SHARE survey

| Wave          | Field time |
|---------------|------------|
| 1             | 2004-2006  |
| 2             | 2006-2007  |
| 3 (SHARELIFE) | 2008-2010  |
| 4             | 2010-2012  |
| 5             | 2013       |
| 6             | 2015       |
| 7             | 2017       |

We used data collected in Wave 2, Wave 4 and Wave 6 which included over 30,000 respondents resident in 21 European countries (Austria, Belgium, Croatia, the Czech Republic, Denmark, Estonia,

France, Germany, Greece, Hungary, Ireland, Italy, Israel, Luxembourg, the Netherlands, Poland, Portugal, Slovenia, Spain, Sweden and Switzerland). Residents from Ireland and Hungary were only included in Waves 2 and 4 respectively, and the data collected in these two waves were combined with Wave 6 data on the remaining 19 countries. For countries not in SHARE, we combined data from similar countries that were in SHARE to obtain estimates for the 11 remaining countries. Therefore, for Bulgaria, Latvia, Lithuania, Romania, and Slovakia we used combined data from the Czech Republic, Estonia, Hungary, Poland and Slovenia. For Iceland, Finland and Norway we used combined data from Denmark and Sweden. For Cyprus and Malta we used combined data from Greece, Italy, Israel, Portugal and Spain. Finally, for the UK we used combined data from Austria, Belgium, France, Germany, Ireland, Luxembourg, and the Netherlands.

**Table A3.** Proportion of primary, outpatient and A&E care visits due to stroke

|                    | Primary care |           | Outpatient care |           | A&E care  |           |
|--------------------|--------------|-----------|-----------------|-----------|-----------|-----------|
|                    | <50 years    | ≥50 years | <50 years       | ≥50 years | <50 years | ≥50 years |
| <b>Austria</b>     | 2.28%        | 7.38%     | 2.28%           | 7.39%     | 2.28%     | 6.63%     |
| <b>Belgium</b>     | 1.22%        | 4.36%     | 1.22%           | 4.37%     | 1.22%     | 3.94%     |
| <b>Bulgaria</b>    | 2.92%        | 6.79%     | 2.92%           | 6.73%     | 2.92%     | 6.76%     |
| <b>Croatia</b>     | 2.26%        | 4.91%     | 2.26%           | 4.97%     | 2.26%     | 4.19%     |
| <b>Cyprus</b>      | 1.96%        | 4.95%     | 1.96%           | 4.89%     | 1.96%     | 4.98%     |
| <b>Czech Rep.</b>  | 3.66%        | 5.03%     | 3.66%           | 5.05%     | 3.66%     | 4.86%     |
| <b>Denmark</b>     | 1.89%        | 4.59%     | 1.89%           | 4.52%     | 1.89%     | 5.37%     |
| <b>Estonia</b>     | 5.16%        | 6.20%     | 5.16%           | 6.15%     | 5.16%     | 7.27%     |
| <b>Finland</b>     | 3.06%        | 6.24%     | 3.06%           | 6.13%     | 3.06%     | 6.69%     |
| <b>France</b>      | 0.91%        | 4.55%     | 0.91%           | 4.52%     | 0.91%     | 7.69%     |
| <b>Germany</b>     | 2.97%        | 4.51%     | 2.97%           | 4.52%     | 2.97%     | 4.15%     |
| <b>Greece</b>      | 1.96%        | 4.71%     | 1.96%           | 4.58%     | 1.96%     | 6.96%     |
| <b>Hungary</b>     | 5.66%        | 7.73%     | 5.66%           | 10.32%    | 5.66%     | 6.47%     |
| <b>Iceland</b>     | 2.35%        | 6.24%     | 2.35%           | 6.13%     | 2.35%     | 6.69%     |
| <b>Ireland</b>     | 0.65%        | 4.97%     | 0.65%           | 5.01%     | 0.65%     | 6.67%     |
| <b>Israel</b>      | 1.96%        | 6.48%     | 1.96%           | 6.48%     | 1.96%     | 6.47%     |
| <b>Italy</b>       | 3.89%        | 3.83%     | 3.89%           | 3.83%     | 3.89%     | 3.42%     |
| <b>Latvia</b>      | 5.16%        | 6.79%     | 5.16%           | 6.73%     | 5.16%     | 6.76%     |
| <b>Lithuania</b>   | 5.31%        | 6.79%     | 5.31%           | 6.73%     | 5.31%     | 6.76%     |
| <b>Luxembourg</b>  | 1.79%        | 2.79%     | 1.79%           | 2.80%     | 3.66%     | 4.86%     |
| <b>Malta</b>       | 1.18%        | 4.95%     | 1.18%           | 4.89%     | 1.18%     | 4.98%     |
| <b>Netherlands</b> | 1.83%        | 3.91%     | 1.83%           | 3.87%     | 1.83%     | 4.27%     |
| <b>Norway</b>      | 2.32%        | 6.24%     | 2.32%           | 6.13%     | 2.32%     | 6.69%     |
| <b>Poland</b>      | 2.58%        | 5.35%     | 2.58%           | 5.36%     | 2.58%     | 5.90%     |
| <b>Portugal</b>    | 1.84%        | 6.79%     | 1.84%           | 6.69%     | 1.84%     | 7.17%     |
| <b>Romania</b>     | 2.92%        | 6.79%     | 2.92%           | 6.73%     | 2.92%     | 6.76%     |
| <b>Slovakia</b>    | 4.16%        | 6.79%     | 4.16%           | 6.73%     | 4.16%     | 6.76%     |
| <b>Slovenia</b>    | 2.20%        | 5.75%     | 2.20%           | 5.69%     | 2.20%     | 6.89%     |
| <b>Spain</b>       | 1.80%        | 3.21%     | 1.80%           | 3.16%     | 1.80%     | 3.80%     |
| <b>Sweden</b>      | 3.32%        | 6.21%     | 3.32%           | 6.14%     | 3.32%     | 6.42%     |
| <b>Switzerland</b> | 2.61%        | 2.67%     | 2.61%           | 2.64%     | 2.61%     | 3.07%     |
| <b>UK</b>          | 1.13%        | 5.16%     | 1.13%           | 5.11%     | 1.13%     | 5.05%     |

Participants in SHARE were asked, amongst other things, the number of times they had visited a primary health care physician, specialist in an outpatient setting and attended A&E over the last 12 months. Using three Poisson regressions, one for each type of resource use, we estimated the country-specific number of visits given the patient had a history stroke, after adjusting for presence of dementia and/or other health conditions and country of residence. This expected number of visits was then multiplied with the number of people with stroke in each country in SHARE, and divided by the total number of visits in that country (i.e. number of people responding in SHARE multiplied by the mean number of visit), in order to obtain the proportion of primary, outpatient, and A&E visits due to stroke in each country (**Table A3**).

### **Hospital inpatient care**

Inpatient care was estimated from the number of stroke-related days in hospital, including day case admissions. The number of days in hospital, which included day cases, was obtained for all countries by primary diagnosis of stroke. Except for Israel, where data was derived from the OECD,<sup>27</sup> all stroke-related days in hospital and day cases were obtained from EUROSTAT.<sup>1</sup>

### **Healthcare unit costs**

For all countries, health care resource use was valued using country-specific unit costs, which were derived from published studies, reports, and national fee schedules. Sources of unit costs per country and resource use category are reported in **Table A4**. For some countries unit costs were derived from the predictions of linear regression analyses of the unit costs of countries with available data.<sup>63 64</sup>

### **Expenditure on Medications**

The costs related to consumption of stroke-related medication were included in the analysis.

OECD Health data provided the total CVD-related pharmaceutical expenditure, defined as those medications coded under the Anatomical Therapeutic Chemical (ATC) Classification Code C (Cardiovascular System), for Austria, Belgium, Czech Republic, Denmark, Estonia, Finland, France, Germany, Greece, Hungary, Iceland, Ireland, Italy, Luxembourg, the Netherlands, Norway, Portugal, Slovakia, Slovenia, Spain, Sweden, Switzerland and the United Kingdom.<sup>27</sup> CVD-related expenditure

on medication was obtained from other sources for: Bulgaria,<sup>165</sup> Croatia,<sup>66</sup> Cyprus,<sup>167</sup> Latvia,<sup>68</sup> and Poland.<sup>169</sup> For Israel, Malta and Romania no data on CVD-related pharmaceutical expenditure was identified. Therefore, for: 1) Israel we used estimates from Italy, 2) Malta we used the average from Cyprus, Italy, Portugal, and Spain; and 3) Romania we used estimates from Bulgaria.

**Table A4. Sources of unit costs by country and healthcare utilisation category**

|                    | Primary care | Outpatient care | A&E         | Inpatient care |
|--------------------|--------------|-----------------|-------------|----------------|
| <b>Austria</b>     | 2            | 2               | 70          | 1              |
| <b>Belgium</b>     | 71           | 71              | 71          | 72             |
| <b>Bulgaria</b>    | 1            | 1               | Regression* | 1              |
| <b>Croatia</b>     | 73           | 73              | 73          | 73             |
| <b>Cyprus</b>      | 74           | 74              | 75          | 76             |
| <b>Czech Rep.</b>  | 9            | 9               | Regression* | 9              |
| <b>Denmark</b>     | 77           | 77              | 78          | 1              |
| <b>Estonia</b>     | 14           | 14              | 14          | 14             |
| <b>Finland</b>     | 79           | 79              | 79          | 80             |
| <b>France</b>      | 16           | 16              | 81          | 1              |
| <b>Germany</b>     | 82           | 83              | 82          | 84             |
| <b>Greece</b>      | 85           | 86              | 85          | 85             |
| <b>Hungary</b>     | 21           | 21              | 22          | 22             |
| <b>Iceland</b>     | 87           | 87              | 88          | 87             |
| <b>Ireland</b>     | 89           | 89              | 89          | 90             |
| <b>Israel</b>      | 91           | 91              | 91          | 91             |
| <b>Italy</b>       | 82           | 82              | 82          | 1              |
| <b>Latvia</b>      | 29           | 29              | Regression  | 1              |
| <b>Lithuania</b>   | 92           | 92              | 82          | 1              |
| <b>Luxembourg</b>  | 93           | 93              | 93          | 1              |
| <b>Malta</b>       | 34           | Regression      | 94          | 94             |
| <b>Netherlands</b> | 94           | 94              | 95          | 94             |
| <b>Norway</b>      | 96           | 96              | 96          | 97             |
| <b>Poland</b>      | 98           | 99              | 99          | 1              |
| <b>Portugal</b>    | 100          | 101             | 101         | 101            |
| <b>Romania</b>     | 102          | 102             | Regression  | 1              |
| <b>Slovakia</b>    | 102          | 102             | Regression  | 1              |
| <b>Slovenia</b>    | 102          | 102             | 94          | 1              |
| <b>Spain</b>       | 103          | 103             | 103         | 104            |
| <b>Sweden</b>      | 105          | 49              | 49          | 49             |
| <b>Switzerland</b> | 98           | 98              | 106         | 98             |
| <b>UK</b>          | 107          | 108             | 108         | 108            |

As only France, Germany and the Netherlands provided data on the proportion of CVD-related pharmaceutical expenditure on stroke,<sup>84 109 110</sup> the proportion of pharmaceutical expenditure due to stroke was averaged across the three countries and applied to the total CVD sales in the remaining countries.

#### **Social care costs**

Nursing and residential care was measured as the number of stroke-related days spent in care homes. There are two types of care homes, nursing and residential homes. A residential home provides care for people who are not able to manage everyday tasks or maintain an independent home of their own while a nursing home provides 24-hour nursing care. Given the data available, we conservatively assumed that only those aged 65 years of age or more would be institutionalised in a nursing/residential care home.

Data on the number of people aged 65 years or over living in a nursing or residential home care was obtained from the OECD for: Belgium, the Czech Republic, Denmark, Estonia, Finland, France, Germany, Hungary, Iceland, Ireland, Israel, Luxembourg, the Netherlands, Norway, Portugal, Romania, Slovakia, Slovenia, Spain, Sweden and Switzerland.<sup>27</sup> For seven other countries this information was derived from country-specific reports drawn up by the European Commission: Bulgaria,<sup>111</sup> Cyprus,<sup>112</sup> Italy,<sup>113</sup> Latvia,<sup>114</sup> Lithuania,<sup>115</sup> Malta,<sup>116</sup> and Poland.<sup>117</sup> For the remaining 4 countries, this information was derived from a number of different sources: Austria,<sup>118</sup> Croatia,<sup>6</sup> Greece,<sup>119</sup> and the United Kingdom.<sup>120</sup>

Participants in SHARE were asked whether they lived in a nursing or residential home. Using a logistic regression analysis, we estimated the country-specific probability of a respondent being institutionalised in a nursing/residential care home due to stroke, adjusting for age, presence of stroke, dementia and/or other health conditions and country of residence. This proportion was then applied to the total number of institutionalised people, and multiplied by 365.25 to obtain the annual number of days institutionalised in a nursing/residential home due to stroke.

In addition, participants in SHARE were asked whether a relative or friend they cared for had died within the last 12 months. If that was the case, participants were further asked, the age and gender of the deceased, the place of death (which could include nursing or residential care home) and the main cause of death (which could include stroke). We, therefore, evaluated the number of people who died within the last 12 months in a nursing/residential care home due to stroke. This was undertaken by adding the age and sex-specific products of:

- 1) Number of stroke related deaths.<sup>127</sup>; and

2) Probability of having been institutionalised before a stroke-related death.

This was estimated using a logistic regression, adjusting for stroke death, country of residence, age and gender.

As it was likely that these people would not have been institutionalised for the full year, we assumed that all patients died halfway through the year. Therefore, the total number of people who died as a result of stroke in a nursing/residential care home was multiplied by 183 days. This estimate was then added to the number of institutionalised days for people living with stroke to obtain the annual number of days institutionalised in a nursing/residential home due to stroke.

**Table A5.** Unit costs (€)

|                | GP  | Visits<br>Outpatient | A&E | Day in<br>hospital | Day in<br>nursing<br>home | Hourly earnings<br>Employed | Non-<br>employed | Yearly earnings<br>Male | Female | Daily<br>earnings |
|----------------|-----|----------------------|-----|--------------------|---------------------------|-----------------------------|------------------|-------------------------|--------|-------------------|
| Austria        | 55  | 69                   | 160 | 588                | 136                       | 24                          | 10               | 50,443                  | 38,703 | 195               |
| Belgium        | 28  | 58                   | 91  | 966                | 74                        | 26                          | 9                | 49,717                  | 45,237 | 207               |
| Bulgaria       | 6   | 24                   | 31  | 93                 | 13                        | 4                           | 1                | 8,117                   | 6,758  | 33                |
| Croatia        | 17  | 15                   | 261 | 110                | 16                        | 8                           | 3                | 14,992                  | 13,737 | 63                |
| Cyprus         | 15  | 30                   | 51  | 148                | 70                        | 14                          | 7                | 28,508                  | 23,155 | 113               |
| Czech Republic | 12  | 16                   | 83  | 261                | 34                        | 8                           | 3                | 16,380                  | 12,271 | 63                |
| Denmark        | 21  | 86                   | 139 | 1,540              | 245                       | 35                          | 22               | 71,550                  | 56,239 | 280               |
| Estonia        | 16  | 53                   | 57  | 269                | 29                        | 8                           | 3                | 18,219                  | 12,586 | 67                |
| Finland        | 153 | 377                  | 423 | 778                | 196                       | 24                          | 14               | 50,407                  | 39,176 | 196               |
| France         | 39  | 146                  | 91  | 717                | 82                        | 21                          | 10               | 41,687                  | 34,469 | 166               |
| Germany        | 53  | 78                   | 96  | 868                | 131                       | 29                          | 9                | 52,774                  | 52,774 | 229               |
| Greece         | 20  | 50                   | 72  | 476                | 53                        | 12                          | 4                | 24,769                  | 20,527 | 100               |
| Hungary        | 5   | 7                    | 121 | 168                | 19                        | 7                           | 2                | 13,260                  | 10,922 | 53                |
| Iceland        | 84  | 141                  | 300 | 1,311              | 227                       | 27                          | 19               | 52,962                  | 44,998 | 214               |
| Ireland        | 51  | 137                  | 272 | 671                | 147                       | 27                          | 9                | 54,479                  | 45,724 | 219               |
| Israel         | 12  | 69                   | 200 | 501                | 112                       | 16                          | 7                | 34,456                  | 22,548 | 125               |
| Italy          | 23  | 88                   | 235 | 654                | 132                       | 20                          | 10               | 38,697                  | 32,266 | 156               |
| Latvia         | 11  | 40                   | 39  | 93                 | 14                        | 7                           | 2                | 14,199                  | 11,069 | 55                |
| Lithuania      | 11  | 27                   | 22  | 123                | 9                         | 6                           | 2                | 12,056                  | 9,638  | 47                |
| Luxembourg     | 46  | 65                   | 81  | 1,175              | 205                       | 33                          | 12               | 62,491                  | 58,530 | 264               |
| Malta          | 39  | 58                   | 97  | 413                | 176                       | 13                          | 4                | 26,211                  | 21,937 | 107               |
| Netherlands    | 32  | 134                  | 167 | 1,446              | 196                       | 27                          | 9                | 53,790                  | 44,018 | 214               |
| Norway         | 70  | 156                  | 152 | 1,364              | 387                       | 30                          | 23               | 59,440                  | 51,206 | 241               |
| Poland         | 6   | 54                   | 24  | 197                | 99                        | 7                           | 3                | 14,430                  | 12,032 | 58                |
| Portugal       | 31  | 68                   | 96  | 312                | 31                        | 10                          | 4                | 20,418                  | 17,025 | 82                |
| Romania        | 9   | 14                   | 70  | 96                 | 14                        | 5                           | 2                | 9,745                   | 9,165  | 41                |
| Slovakia       | 22  | 33                   | 41  | 198                | 31                        | 8                           | 3                | 15,693                  | 12,159 | 61                |
| Slovenia       | 26  | 37                   | 98  | 333                | 61                        | 13                          | 5                | 25,596                  | 23,413 | 107               |
| Spain          | 39  | 130                  | 185 | 714                | 92                        | 16                          | 5                | 31,161                  | 27,022 | 127               |
| Sweden         | 162 | 428                  | 394 | 922                | 211                       | 27                          | 13               | 52,580                  | 45,557 | 214               |
| Switzerland    | 49  | 49                   | 142 | 1,219              | 229                       | 38                          | 18               | 73,725                  | 64,884 | 303               |
| United Kingdom | 34  | 137                  | 169 | 665                | 136                       | 23                          | 9                | 48,109                  | 35,491 | 183               |

A day in a nursing home was then valued using a number of different country-specific sources. For 10 countries, this information was obtained from long-term care institutionalisation expenditure estimates



compiled in country-specific reports authored by the European Commission: Bulgaria,<sup>111</sup> Cyprus,<sup>112</sup> Greece,<sup>121</sup> Hungary,<sup>122</sup> Italy,<sup>113</sup> Latvia,<sup>114</sup> Lithuania,<sup>115</sup> Malta,<sup>116</sup> Poland<sup>117</sup> and Slovenia.<sup>123</sup> For the remaining countries, unit costs were obtained from a wide range of sources: Austria,<sup>124</sup> Belgium,<sup>125</sup> Croatia,<sup>126</sup> Czech Republic,<sup>127</sup> Denmark,<sup>128</sup> Estonia,<sup>129</sup> Finland,<sup>130</sup> France,<sup>131</sup> Germany,<sup>131</sup> Iceland,<sup>132</sup> Ireland,<sup>133</sup> Israel,<sup>134</sup> Luxembourg,<sup>33</sup> the Netherlands,<sup>135</sup> Norway,<sup>136</sup> Portugal,<sup>137</sup> Romania,<sup>138</sup> Slovakia,<sup>138</sup> Spain,<sup>139</sup> Sweden,<sup>140</sup> Switzerland,<sup>141</sup> and the United Kingdom (**Table A5**).<sup>107</sup>

### **Informal care**

We conservatively assumed that only patients severely limited in daily activities or who were terminally ill would receive informal care. We used country-specific data to estimate the number of people with stroke using prevalence estimates from the Global Burden of Disease (GBD)<sup>142</sup> and then used data from SHARE to assess the informal care needs of stroke patients.<sup>62</sup>

#### *Informal care to patients severely limited in daily activities due to stroke*

Hours of informal care for severely limited stroke patients were estimated by adding the country-, age- and sex-specific products of:

- 1) Prevalence of stroke in the population, which was obtained from prevalence estimates for stroke from the GBD study;<sup>142</sup>
- 2) Probability of being severely limited in daily activities due to stroke. Using data from SHARE, we undertook logistic regressions adjusting for age, gender, presence of stroke, dementia and other health conditions, and country of residence. As a result, we obtained country-specific estimates of the probability of being severely limited in daily activities due to stroke.
- 3) Probability of receiving informal care due to stroke. Using data from SHARE, we evaluated the probability that stroke patients received informal care. We performed two logistic regressions (one for care from inside the household and the other for care outside the household) after adjusting for age, gender, presence of stroke, dementia and other health conditions, limitations in daily living and country of residence.
- 4) Hours of informal care received due to stroke. Using data from SHARE, we performed an ordered logistic regression to assess the amount of informal care time (almost daily, almost weekly, almost every month or less often) that patients with stroke received after adjusting for age,

gender, presence of stroke, dementia and other health conditions, limitations in daily living, and country of residence. These were converted into hours using the information from SHARE on the number of unpaid care hours (either daily, weekly, monthly or annually) patients with stroke received.

#### *Informal care to terminally ill patients with stroke*

Hours of informal care for terminally ill stroke patients were estimated by adding the age and sex-specific products of:

- 1) Number of stroke deaths. Age- and gender-stratified cancer deaths were derived from EUROSTAT (WHO in the case of Israel).<sup>1 143</sup>
- 2) Probability of receiving informal care in the year before dying from stroke. Using the end-of-life questionnaire, participants in SHARE were asked to report whether they had provided unpaid care for anyone who had died in the last year, including the age of the person to whom care was provided and the health conditions from which that person was suffering. The probability of providing informal care for a stroke patient was estimated using a logistic regression analysis after adjusting for age, gender and country.
- 3) Hours of informal care received due to stroke. Using data from the end-of-life questionnaire in SHARE, we performed an ordered logistic regression to assess the amount of informal care time (almost daily, almost weekly, almost every month or less often) that caregivers provided to a stroke patient after adjusting for age, gender, and country of residence. These were converted into hours using the information from SHARE on the number of unpaid care hours (either daily, weekly, monthly or annually) that caregivers provided to stroke patients.

#### *Valuing informal care*

Participants in SHARE were asked about the relationship between carer and person being cared (e.g. spouse, sibling, offspring, parent friend etc...). We assumed that spouses, siblings and friends providing the care would be of similar age to the patient, therefore carers of patients aged 65 years or more were assumed to be retired, and those carers of patients aged less than 65 years were assumed to be of working-age. If care was being provided by either the patients' children or their children's spouses, then it was assumed that these informal carers would be under 65 years of age.

Using gender-specific economic activity and unemployment rates for each country,<sup>1 144</sup> we then determined the proportion of these carers who were employed or unemployed/economically inactive.

The mean net hourly wage rate was applied to informal care provided by those carers in working age and who were economically active and in employment. Annual earnings were adjusted to hourly wage rates, assuming there were 230 working days each year, and each day consisted of 8 hours of work. For those carers in retirement, unemployed, or economically inactive, the national hourly minimum wage was applied.<sup>1 145</sup> For those countries with no official minimum wage rate (Cyprus, Denmark, Finland, Germany, Italy and Sweden), the worst paid sector in the economy was proxied as a minimum wage.

### **Morbidity losses**

The costs associated with lost productivity due to morbidity were the costs associated with absence of work due to stroke. Morbidity losses could occur due to: individuals taking absence from leave for a defined period of time; or individuals being declared incapacitated or disabled due to their condition, and therefore leaving the labour market. **Table A6** details all the sources used to obtain temporary and permanent absence from work due to stroke.

#### *Temporary absence from work due to sickness*

Country-specific overall annual days of sickness leave due to all conditions was obtained for all countries, except for Cyprus (**Table A6**). As a result, we used the total per employed person days of work due to temporary sickness in Greece and multiplied this by the number of employed people in Cyprus.<sup>1 146</sup>

To the total number of days of work due to sickness we applied the proportion of absence that was attributable to stroke using the following:

1. In the Czech Republic,<sup>147</sup> France,<sup>148</sup> Germany,<sup>149</sup> and the UK<sup>150</sup> published data were available on the proportion of temporary absence from work due to stroke;
2. In Austria,<sup>2</sup> Belgium,<sup>151</sup> Estonia,<sup>14</sup> Italy,<sup>152</sup> Luxembourg,<sup>153</sup> the Netherlands,<sup>154</sup> Norway,<sup>155</sup> Poland,<sup>156</sup> Slovenia,<sup>45</sup> and Spain<sup>157</sup> published data were available on the proportion of

temporary absence from work due to CVD. To evaluate the proportion of temporary absence from work due to stroke, we obtained the proportion of CVD-related hospital inpatient days in the working age population due to stroke,<sup>1</sup> and applied it to the total number of CVD-related days of temporary work absence;

3. In Finland<sup>158</sup> and Sweden<sup>159</sup> we obtained data on the proportion of overall permanent absence from work (in the form of disability pensions for the working age population) due to CVD in the working age population, and assumed this would be the same as the proportion for temporary absence from work. To evaluate the proportion of temporary absence from work due to stroke, we obtained the proportion of CVD-related hospital inpatient days in the working age population due to stroke,<sup>1</sup> and applied it to the total number of CVD-related days of temporary work absence;
4. We obtained no information on the proportion of absence from work due to stroke or CVD for 16 countries. Therefore, we used the proportion of temporary absence from work due to stroke for:
  - Slovakia, where estimates from the Czech Republic were used,<sup>147</sup> and
  - Switzerland, where estimates from Germany were used.<sup>149</sup>

For 14 countries, we used the proportion of temporary absence from work due to CVD for:

- Bulgaria, Hungary, and Romania, where estimates from Poland were used,<sup>156</sup>
- Croatia, where estimates from Slovenia were used,<sup>45</sup>
- Cyprus, Greece and Portugal, where estimates from Spain were used,<sup>157</sup>
- Denmark and Iceland, where estimates from Sweden were used,<sup>159</sup>
- Ireland, where estimates from the UK were used,<sup>150</sup>
- Israel and Malta, where estimates from Italy were used,<sup>152</sup> and
- Latvia and Lithuania, where estimates from Estonia were used.<sup>14</sup>

To evaluate the proportion of temporary absence from work due to stroke, we obtained the proportion of CVD-related hospital inpatient days in the working age population due to stroke,<sup>1</sup> and applied it to the total number of CVD-related days of temporary work absence.

**Table A6.** Sources used to obtain morbidity losses

|                    | Temporary absence from work | Permanent absence from work |
|--------------------|-----------------------------|-----------------------------|
| <b>Austria</b>     | 2 <sup>120</sup>            | 1 <sup>20</sup>             |
| <b>Belgium</b>     | 160 161                     | 161                         |
| <b>Bulgaria</b>    | 156 162                     | 156 163                     |
| <b>Croatia</b>     | 6 45                        | 6 45                        |
| <b>Cyprus</b>      | 146 157                     | 146 164                     |
| <b>Czech Rep.</b>  | 147                         | 8 147                       |
| <b>Denmark</b>     | 159 165                     | 159 166                     |
| <b>Estonia</b>     | 14                          | 14 167                      |
| <b>Finland</b>     | 158 168                     | 158                         |
| <b>France</b>      | 27 148                      | 169                         |
| <b>Germany</b>     | 149 170                     | 171 172                     |
| <b>Greece</b>      | 146 157                     | 146 164                     |
| <b>Hungary</b>     | 156 173                     | 156 174                     |
| <b>Iceland</b>     | 87 159                      | 159 175                     |
| <b>Ireland</b>     | 150 176                     | 177 178                     |
| <b>Israel</b>      | 27 152                      | 179 180                     |
| <b>Italy</b>       | 152 181                     | 180 182                     |
| <b>Latvia</b>      | 14 183                      | 14 184                      |
| <b>Lithuania</b>   | 14 31                       | 14 185                      |
| <b>Luxembourg</b>  | 153 186                     | 33 153                      |
| <b>Malta</b>       | 34 152                      | 34 180                      |
| <b>Netherlands</b> | 154 187                     | 154 188                     |
| <b>Norway</b>      | 27 155                      | 155 189                     |
| <b>Poland</b>      | 156                         | 40 156                      |
| <b>Portugal</b>    | 157 190                     | 164 191                     |
| <b>Romania</b>     | 156 163                     | 156 163                     |
| <b>Slovakia</b>    | 147 192                     | 147 192                     |
| <b>Slovenia</b>    | 45                          | 45 193                      |
| <b>Spain</b>       | 27 157                      | 164 194                     |
| <b>Sweden</b>      | 159 195                     | 159 195                     |
| <b>Switzerland</b> | 149 196                     | 172 197                     |
| <b>UK</b>          | 150                         | 178                         |

*Permanent absence from work due to sickness*

Country-specific information on the numbers of working-age individuals receiving incapacity or disability benefits and not being able to work due to all conditions was obtained for all countries except for Bulgaria and Cyprus (**Table A6**). As a result, we used the per capita number of people receiving disability benefits in the working age population in Romania<sup>163</sup> and Greece<sup>146</sup> and multiplied this by the working age population in Bulgaria and Cyprus,<sup>1</sup> respectively.

To the total number of people receiving disability benefits we applied the proportion of permanent absence that was attributable to stroke using the following:

1. In Austria,<sup>120</sup> France,<sup>169</sup> Germany<sup>172</sup> and the UK<sup>178</sup> published data were available on the proportion of permanent absence from work due to stroke;

2. In Belgium,<sup>161</sup> Finland,<sup>158</sup> Italy,<sup>180</sup> Luxembourg,<sup>153</sup> Norway,<sup>155</sup> Spain<sup>164</sup> and Sweden<sup>159</sup> published data were available on the proportion of permanent absence from work due to CVD. To evaluate the proportion of permanent absence from work due to stroke, we obtained the proportion of CVD-related hospital inpatient days in the working age population due to stroke,<sup>1</sup> and applied it to the total number of CVD-related number of people receiving disability/incapacity benefits;
3. In the Czech Republic<sup>147</sup> we obtained data on the proportion of temporary absence from work (in the form of sickness days) due to stroke, and assumed this would be the same as the proportion for permanent absence from work; and
4. In Estonia,<sup>14</sup> the Netherlands,<sup>154</sup> Poland,<sup>156</sup> and Slovenia<sup>45</sup> we obtained data on the proportion of overall temporary absence from work (in the form of sickness days) due to CVD, and assumed this would be the same as the proportion for permanent absence from work. To evaluate the proportion of permanent absence from work due to stroke, we obtained the proportion of CVD-related hospital inpatient days in the working age population due to stroke,<sup>1</sup> and applied it to the total number of CVD-related number of people receiving disability/incapacity benefits.

We obtained no information on the proportion of absence from work due to stroke or CVD for 16 countries. Therefore, we used the proportion of permanent absence from work due to stroke for:

- Ireland,<sup>178</sup> where estimates from the UK were used, and
- Switzerland,<sup>172</sup> where estimates from Germany were used.

For Slovakia we used the proportion of temporary absence from work due to stroke from the Czech Republic.<sup>147</sup>

For 7 countries, we used the proportion of permanent absence from work due to CVD:

- Cyprus, Greece and Portugal, where estimates from Spain were used,<sup>164</sup>
- Denmark and Iceland, where estimates from Sweden were used,<sup>159</sup> and
- Israel and Malta were estimates from Italy were used.<sup>180</sup>

For the remaining 6 countries, we used the proportion of temporary absence from work due to CVD:

- Bulgaria, Hungary and Romania, where estimates from Poland were used,<sup>156</sup>

- Croatia, where estimates from Slovenia were used,<sup>45</sup> and
- Latvia and Lithuania, where estimates from Estonia<sup>14</sup> were used.

To evaluate the proportion of permanent absence from work due to stroke, we obtained the proportion of CVD-related hospital inpatient days in the working age population due to stroke,<sup>1</sup> and applied it to the total number of CVD-related number of people receiving disability/incapacity benefits.

#### *Valuing absence from work*

The mean annual earnings were converted to mean daily earnings.<sup>1 145</sup> The product of working days lost and mean daily earnings provided the productivity losses associated with stroke. Furthermore, we used the “friction period” approach, whereby only the first 90 days of work absence were counted, as absent workers are likely to be replaced.<sup>198</sup>

#### **Mortality losses**

For all countries, we assumed an initial working age of 15. Age and gender specific deaths due to stroke were obtained for all countries.<sup>1 143</sup> The number of potential working years lost was then estimated as the difference between the age at death and maximum age of retirement (which we set at 79 years of age). However, this estimate would overestimate the total working years lost as not everyone will be economically active (i.e. either working or actively searching for work) or employed. Therefore, age- and gender-specific unemployment and activity rates,<sup>1 144</sup> for each of the 32 countries were applied to the potential foregone earnings due to premature mortality. The total number of working years lost was then multiplied by gender-specific average annual earnings.<sup>1 145</sup> Future earnings lost due to mortality were discounted to present values using a 3.5% annual rate,<sup>199</sup> i.e. the value society attaches to present as opposed to future costs.

#### **References**

1. European Commission. Eurostat: Your key to European Statistics. <https://ec.europa.eu/eurostat/data/database> (accessed 07/05/2019).
2. Herausgeber und Verleger: Hauptverband der österr. Sozialversicherungsträger. Statistisches Handbuch der österreichischen Sozialversicherung 2016. . <http://www.bva.at/cdscontent/load?contentid=10008.603361&version=1446133514> (accessed 13/12/2017).
3. Institut Scientifique de Santé Publique. Contacts avec le médecin généraliste [https://his.wiv-isp.be/fr/Documents%20partages/GP\\_FR\\_2013.pdf](https://his.wiv-isp.be/fr/Documents%20partages/GP_FR_2013.pdf) (accessed 09/01/2018).

4. Institut Scientifique de Santé Publique. Consultations chez un médecin spécialiste. [https://his.wiv-isp.be/fr/Documents%20partages/SP\\_FR\\_2013.pdf](https://his.wiv-isp.be/fr/Documents%20partages/SP_FR_2013.pdf) (accessed 09/01/2018).
5. Hayes O, Novkov H. Emergency Health Services in Bulgaria. *Am J Emerg Med* 2002;20:122-25.
6. Croatian Bureau of Statistics. 2016 Statistical Yearbook of the Republic of Croatia. [https://www.dzs.hr/Hrv\\_Eng/ljetopis/2016/sljh2016.pdf](https://www.dzs.hr/Hrv_Eng/ljetopis/2016/sljh2016.pdf) (accessed 01/03/2018).
7. Statistical Service Republic of Cyprus. Health and Hospital Statistics 2015. [www.mof.gov.cy/mof/cystat/statistics.nsf/All/39FF8C6C587B26A6C22579EC002D5471/\\$file/HEALTH\\_HOSPITAL\\_STATS-2015-280617.pdf?OpenElement](http://www.mof.gov.cy/mof/cystat/statistics.nsf/All/39FF8C6C587B26A6C22579EC002D5471/$file/HEALTH_HOSPITAL_STATS-2015-280617.pdf?OpenElement) (accessed 01/03/2018).
8. Czech Statistical Office. Statistical Yearbook of the Czech Republic - 2017. Social Security. <https://www.czso.cz/csu/czso/25-social-security-pub0uzkabl> (accessed 01/03/2018).
9. Cesky Statisticky Urad. Zdravotnická ročenka České republiky 2016. . <http://www.uzis.cz/katalog/rocenky/zdravotnicka-rocenka-ceske-republiky-1961-az-2013> (accessed 02/03/2018).
10. Czech Statistical Office. Statistical Yearbook of the Czech Republic - 2014. [https://www.czso.cz/csu/czso/320198-14-eng\\_r\\_2014-24](https://www.czso.cz/csu/czso/320198-14-eng_r_2014-24) (accessed 02/03/2018).
11. Statistics Denmark. Contacts covered by the public health insurance by region, type of benefits, age, sex and socioeconomic status. [www.statbank.dk/statbank5a/default.asp?w=1607](http://www.statbank.dk/statbank5a/default.asp?w=1607) (accessed 02/03/2018).
12. Statistics Denmark. Out-patient treatments by sex, age, diagnosis, region and time. [www.statbank.dk/statbank5a/default.asp?w=1607](http://www.statbank.dk/statbank5a/default.asp?w=1607) (accessed 02/03/2018).
13. Statistics Denmark. Emergency department visits by sex, age, region, time and diagnosis. [www.statbank.dk/statbank5a/default.asp?w=1607](http://www.statbank.dk/statbank5a/default.asp?w=1607) (accessed 02/03/2018).
14. Estonian Health Insurance Fund. Estonian Health Insurance Fund Yearbook 2016. [https://www.haigekassa.ee/sites/default/files/uuringud\\_aruanded/haigekassa\\_eng\\_loplik.pdf](https://www.haigekassa.ee/sites/default/files/uuringud_aruanded/haigekassa_eng_loplik.pdf) (accessed 02/03/2018).
15. National Institute for Health and Welfare. Statistical information on welfare and health in Finland. <https://www.sotkanet.fi/sotkanet/en/index?> (accessed 02/03/2018).
16. Institut de Recherche et Documentation en Economie de la Sante. Eco-Sante 2016. <http://www.ecosante.fr/index2.php?base=DEPA&langh=FRA&langs=FRA> (accessed 27/03/2018).
17. Ministere des Affaires sociales et de la sante. Enquête nationale sur les structures des urgences hospitalières, juin 2013. <http://drees.social-sante.gouv.fr/etudes-et-statistiques/open-data/etablissements-de-sante-sociaux-et-medico-sociaux/article/enquete-nationale-sur-les-structures-des-urgences-hospitalieres-juin-2013> (accessed 27/03/2018).
18. Eurohealth. Providing emergency medical care. <http://www.lse.ac.uk/LSEHealthAndSocialCare/pdf/eurohealth/EuroHealth-v21n4-LAYOUT-14Dec15-webFinal.pdf> (accessed 27/06/2018).
19. Hellenic Statistical Authority. Health Interview Survey (HIS) / 2014. <http://www.statistics.gr/en/statistics/-/publication/SHE22/-> (accessed 27/03/2018).
20. Hungarian Central Statistical Office. Number of Consultations of GPs and family paediatricians. <http://statinfo.ksh.hu/Statinfo/haViewer.jsp> (accessed 27/03/2018).
21. National Health Insurance Fund Administration. Statistical Yearbook 2016. <http://site.oep.hu/statisztika/2016/html/eng/A2.html> (accessed 27/03/2018).
22. National Health Insurance Fund Administration. Orszagos Egeszsegbiztositasi Penztar, Annual Report 2010. [http://www.oep.hu/portal/page?\\_pageid=34,35856,34\\_37948182&\\_dad=portal&\\_schema=PORTAL](http://www.oep.hu/portal/page?_pageid=34,35856,34_37948182&_dad=portal&_schema=PORTAL) (accessed 27/03/2018).
23. Icelandic Directorate of Health. Primary healthcare. <https://www.landlaeknir.is/english/statistics/health-care-services/primary-health-care/> (accessed 04/07/2018).
24. Statistics Iceland. Contacts with specialists. [http://px.hagstofa.is/pxen/pxweb/en/Samfelag/Samfelag\\_\\_heilbrigdismal\\_\\_heilbrigdisthjonust/a/HEI04312.px/table/tableViewLayout1/?rxid=7181cd32-5511-4373-b4e6-befb1c473c84](http://px.hagstofa.is/pxen/pxweb/en/Samfelag/Samfelag__heilbrigdismal__heilbrigdisthjonust/a/HEI04312.px/table/tableViewLayout1/?rxid=7181cd32-5511-4373-b4e6-befb1c473c84) (accessed 04/07/2018).
25. Health Service Executive. Key performance indicator: Metadata 2016. <http://www.hse.ie/eng/services/publications/KPIs/Acute%20Hospitals%20KPI%20Metadata%202016.pdf> (accessed 01/05/2018).
26. Central Bureau of Statistics. Visits to physicians during one year, by age, sex and socio-demographic characteristics.



- [http://www.cbs.gov.il/publications13/health\\_survey09\\_1500/pdf/t01\\_1.pdf](http://www.cbs.gov.il/publications13/health_survey09_1500/pdf/t01_1.pdf) (accessed 03/09/2018).
27. OECD. OECD Health Statistics 2018. <http://www.oecd.org/els/health-systems/health-data.htm> (accessed 07/05/2019).
  28. Istituto nazionale di statistica. Struttura e attività degli istituti di cura. <http://www.istat.it/it/archivio/47158> (accessed 21/05/2018).
  29. Nacionālais veselības dienests. VĒSTIS Nr. 25. <http://www.vmnvd.gov.lv/uploads/files/5a72ebdca48e8.pdf> (accessed 01/05/2018).
  30. Centrālā statistikas pārvalde. 2016 Statistical Yearbook of Latvia. [http://www.csb.gov.lv/sites/default/files/nr\\_01\\_latvijas\\_statistikas\\_gadagramata\\_2016\\_statistical\\_yearbook\\_of\\_latvia\\_16\\_00\\_lv\\_en\\_0.pdf](http://www.csb.gov.lv/sites/default/files/nr_01_latvijas_statistikas_gadagramata_2016_statistical_yearbook_of_latvia_16_00_lv_en_0.pdf) (accessed 01/05/2018).
  31. Lithuanian Ministry of Health. Health Statistics of Lithuania. [http://hi.lt/html/en/health\\_statistic.htm](http://hi.lt/html/en/health_statistic.htm) (accessed 09/05/2018).
  32. Lietuvo Statistikos Departamentas. Number of persons who received emergency medical care. <https://osp.stat.gov.lt/statistiniu-rodikliu-analize?theme=all#/> (accessed 09/05/2018).
  33. Ministère de la Sécurité Sociale. Rapport général 2017 sur la sécurité sociale. <http://www.statistiques.public.lu/fr/actualites/conditions-sociales/sante-secu/2017/12/20171204/index.html> (accessed 07/06/2018).
  34. National Statistics Office. Social Protection: Malta and the EU 2015. [https://nso.gov.mt/en/publications/Publications\\_by\\_Unit/Documents/A2\\_Public\\_Finance/Social-Protection-Malta-and-the-EU-2015.pdf](https://nso.gov.mt/en/publications/Publications_by_Unit/Documents/A2_Public_Finance/Social-Protection-Malta-and-the-EU-2015.pdf) (accessed 07/06/2018).
  35. Centraal Bureau voor de Statistiek. Health and health care; personal characteristics. <https://opendata.cbs.nl/statline/#/CBS/en/dataset/83005ENG/table?ts=1528365983132> (accessed 07/06/2018).
  36. Gaakeer MI, van den Brand CL, Veugelers R, et al. Inventarisatie van SEH-bezoeken en zelfverwijzers. [https://www.ntvg.nl/artikelen/inventarisatie-van-seh-bezoeken-en-zelfverwijzers/extended\\_abstract](https://www.ntvg.nl/artikelen/inventarisatie-van-seh-bezoeken-en-zelfverwijzers/extended_abstract) (accessed 24/01/2017).
  37. Statistics Norway. General practitioners consultations, by age, sex, diagnosis, contents and year. <https://www.ssb.no/en/statbank/table/10141/tableViewLayout1/> (accessed 04/07/2018).
  38. Statistics Norway. Patients, discharges and bed-days at general hospitals, by region, sex, age, diagnosis: Chapter in ICD-10, contents and year. <https://www.ssb.no/en/statbank/table/10261/tableViewLayout1/> (accessed 04/07/2018).
  39. Statistics Norway. Emergency primary health care consultations, by age, sex, diagnosis, contents and year. <https://www.ssb.no/en/statbank/table/10903/tableViewLayout1/> (accessed 04/07/2018).
  40. Central Statistical Office. Local Data Bank. <https://bdl.stat.gov.pl/BDL/dane/podgrup/temat> (accessed 10/04/2018).
  41. Instituto Nacional de Estadística. Medical appointments in external appointments of hospitals. [https://inept/xportal/xmain?xid=INE&xpgid=ine\\_indicadores&indOcorrCod=0008105&contexto=bd&selTab=tab2](https://inept/xportal/xmain?xid=INE&xpgid=ine_indicadores&indOcorrCod=0008105&contexto=bd&selTab=tab2) (accessed 11/06/2018).
  42. Vlădescu C, Scîntee SG, Olsavszky V, et al. Romania: Health system review. *Health Systems in Transition* 2016;18:1-170.
  43. National Institute of Statistics. Romanian Statistical Yearbook. [http://www.insse.ro/cms/sites/default/files/field/publicatii/anuar\\_statistic\\_al\\_romaniei\\_2016\\_for\\_mat\\_carte\\_0.pdf](http://www.insse.ro/cms/sites/default/files/field/publicatii/anuar_statistic_al_romaniei_2016_for_mat_carte_0.pdf) (accessed 12/06/2018).
  44. Narodne Centrum Zdravonických Informácií. Health Statistics Yearbook of the Slovak Republic. [http://www.nczisk.sk/Documents/rocniky/2016/Zdravotnicka\\_rocenka\\_Slovenskej\\_republiky\\_2016.pdf](http://www.nczisk.sk/Documents/rocniky/2016/Zdravotnicka_rocenka_Slovenskej_republiky_2016.pdf) (accessed 25/06/2018).
  45. Nacionalni inštitut za javno zdravje. Zdravstveni statistični letopis 2016. <http://www.nijz.si/sl/publikacije/zdravstveni-statisticni-letopis-2016> (accessed 09/04/2018).
  46. Ministerio de Sanidad SSeI. Sistema de Información de Atención Primaria. <http://pestadistico.inteligenciadegestion.msssi.es/publicoSNS/comun/ArbolNodos.aspx?idNodo=6397> (accessed 27/02/2018).
  47. Ministerio de Sanidad SSeI. Actividad Asistencial. <http://pestadistico.inteligenciadegestion.msssi.es/publicoSNS/comun/ArbolNodos.aspx?idNodo=14032> (accessed 27/02/2018).
  48. Statistics Sweden. Statistical Yearbook of Sweden 2014. [http://www.scb.se/Statistik/\\_Publikationer/OV0904\\_2014A01\\_BR\\_20\\_A01BR1401.pdf](http://www.scb.se/Statistik/_Publikationer/OV0904_2014A01_BR_20_A01BR1401.pdf) (accessed 19/06/2018).

49. Sveriges Kommuner och Landsting. KPP database somatically specialized care. [https://statva.skl.se/KPP\\_somatik\\_publik.html](https://statva.skl.se/KPP_somatik_publik.html) (accessed 19/06/2018).
50. Federal Statistical Office. Swiss Health Survey. <https://www.bfs.admin.ch/bfs/en/home/statistics/catalogues-databases/publications.assetdetail.349060.html> (accessed 04/07/2018).
51. Sanchez B, Hirzel AH, Bingisser R, et al. State of emergency medicine in Switzerland: a national profile of emergency departments in 2006. *Int J Emerg Med* 2013;6:23.
52. Shaha M, Gmur S, Schoenenberger AW, et al. Trends and characteristics of attendance at the emergency department of a Swiss university hospital: 2002-2012. *Swiss Med Wkly* 2015;145:w14141.
53. Hobbs R, Bankhead C, Mukhtar T, et al. Clinical workload in UK primary care: a retrospective analysis of 100 million consultations in England 2007-14. *Lancet* 2014;387:2323-30.
54. ISD Scotland. GP consultations/Practice team information statistics. <http://www.isdscotland.org/Health-Topics/General-Practice/GP-consultations/> (accessed 19/06/2018).
55. StatsWales. Outpatient attendances by organisation and site. <https://statswales.gov.wales/Catalogue/Health-and-Social-Care/NHS-Hospital-Activity/Outpatient-Activity/outpatient-attendances-by-organisation-site> (accessed 19/06/2018).
56. NHS Digital. Hospital outpatient activity. <https://digital.nhs.uk/data-and-information/publications/statistical/hospital-outpatient-activity> (accessed 19/06/2018).
57. Department of Health. Hospital statistics: outpatient activity statistics 2016/17. <https://www.health-ni.gov.uk/publications/hospital-statistics-outpatient-activity-statistics-201617> (accessed 19/06/2018).
58. ISD Scotland. Outpatients. <http://www.isdscotland.org/Health-Topics/Finance/Costs/Detailed-Tables/Speciality-Costs/Outpatients.asp> (accessed 19/06/2018).
59. NHS Digital. Hospital Accident and Emergency Activity. <https://digital.nhs.uk/data-and-information/publications/statistical/hospital-accident-emergency-activity/2016-17> (accessed 19/06/2018).
60. Department of Health. Northern Ireland Hospital Statistics: Emergency Care (2016/17). <https://www.health-ni.gov.uk/news/northern-ireland-hospital-statistics-emergency-care-201617> (accessed 19/06/2018).
61. NHS Digital. Hospital Admitted Patient Care. <https://digital.nhs.uk/data-and-information/publications/statistical/hospital-admitted-patient-care-activity/2016-17> (accessed 19/06/2018).
62. Borsch-Supan A, Brandt M, Hunkler C, et al. Data Resource Profile: The Survey of Health, Ageing and Retirement in Europe (SHARE). *International Journal of Epidemiology* 2013 doi: 10.1093/ije/dyt088
63. Luengo-Fernandez R, Leal J, Gray A, et al. Economic burden of cancer across the European Union: a population-based cost analysis. *The Lancet Oncology* 2013;14:1165-74.
64. Leal J, Luengo-Fernandez R, Sullivan R, et al. Economic burden of bladder cancer across the European Union. *European Urology* 2016;69:438-47.
65. Bulgarian Drug Agency. Annual Activity Report 2011 [http://www.bda.bg/images/stories/documents/annual\\_reports/doclad\\_2011.pdf](http://www.bda.bg/images/stories/documents/annual_reports/doclad_2011.pdf) (accessed 01/03/2018).
66. Agencija za lijekove I medicinske proizvode. Potrošnja lijekova u Hrvatskoj 2012 - 2016. [www.halmed.hr/fdsak3jnFsk1Kfa/publikacije/Potrosnja-lijekova-u-RH\\_2012-2016.pdf](http://www.halmed.hr/fdsak3jnFsk1Kfa/publikacije/Potrosnja-lijekova-u-RH_2012-2016.pdf) (accessed 01/03/2018).
67. Golna C, Pashardes P, Allin S, et al. Health care systems in transition: Cyprus. Copenhagen: WHO Regional Office for Europe on behalf of the European Observatory on Health Systems and Policies, 2004.
68. Latvian State Agency of Medicines. Baltic Statistics on Medicines 2013-2015. [http://www.ravimiamet.ee/sites/default/files/documents/publications/baltic\\_statistics\\_on\\_medicines\\_2013\\_2015/index.html#4](http://www.ravimiamet.ee/sites/default/files/documents/publications/baltic_statistics_on_medicines_2013_2015/index.html#4) (accessed 21/05/2018).
69. Kuszewski K, Sobczack A, Gorynski P, et al. Poland: Health Systems in Transition Summary. [http://www.euro.who.int/\\_\\_data/assets/pdf\\_file/0004/98869/E88670sum.pdf](http://www.euro.who.int/__data/assets/pdf_file/0004/98869/E88670sum.pdf) (accessed 06/01/2017).
70. Johansson G, Andeasson EB, Larsson PE, et al. Cost effectiveness on budesonide/normoterol nor maintenance and reliever therapy versus salmeterol/nlucasone plus salbutamol in the treatment on asthma. *Pharmacoeconomics* 2006;24:695-708.

71. INAMI. Tarifs des medecins a partir du 1er janvier 2018 (partie02). [http://www.riziv.fgov.be/SiteCollectionDocuments/tarif\\_medecins\\_partie01\\_20180101.pdf](http://www.riziv.fgov.be/SiteCollectionDocuments/tarif_medecins_partie01_20180101.pdf) (accessed 09/01/2018).
72. INAMI. Cellule Technique de traitement de données relatives aux hôpitaux. <https://tct.fgov.be/webetct/etct-web/html/fr/index.jsp> (accessed 10/01/2018).
73. Jukic V, Jakovljevic M, Filipic I, et al. Cost-utility analysis of depot atypical antipsychotics for chronic schizophrenia in Croatia. *Value in Health* 2013;2:181-88.
74. Ministry of Health. Revision of Healthcare Scheme in Public Hospitals from 1/8/2013. <https://www.moh.gov.cy/Moh/MOH.nsf/All/9708963BBC895E4FC2257BAD0045791A?OpenDocument&highlight=charges> (accessed 01/03/2018).
75. Ministry of Health. Price charges. [http://www.moh.gov.cy/Moh/moh.nsf/price\\_charges\\_en/price\\_charges\\_en?OpenDocument](http://www.moh.gov.cy/Moh/moh.nsf/price_charges_en/price_charges_en?OpenDocument) (accessed 01/03/2018).
76. Petrou P, Talias MA. A pilot study to assess feasibility of value based pricing in Cyprus through pharmaco-economic modelling and assessment of its operational framework: sorafenib for second line renal cell cancer. *Cost Effectiveness and Resource Allocation* 2014;12
77. Statistics Denmark. Public health insurance expenses by socioeconomic status, sex, age, region, time and type of benefits. [www.statbank.dk/statbank5a/default.asp?w=1607](http://www.statbank.dk/statbank5a/default.asp?w=1607) (accessed 02/03/2018).
78. Nielsen R, Kankaanranta H, Bjermer L, et al. Cost effectiveness of adding budesonide/formoterol to tiotropium in COPD in four Nordic countries. *Respiratory Medicine* 2013;107:1709-21.
79. Heinonen J, Koskela TH, Soini E, et al. Primary-care-based episodes of care and their costs in a three-month follow-up in Finland. *Scandinavian Journal of Primary Health Care* 2015;33:283-90.
80. Mattila A, Mrena J, Kellokumpu I. Cost-analysis and effectiveness of one-stage laparoscopic versus two-stage endolaparoscopic management of cholecystocholedocholithiasis: a retrospective cohort study. *BMC Surgery* 2017;17:79.
81. de Zelicourt M, de Toffol B, Vespignani H, et al. Management of focal epilepsy in adults treated with polytherapy in France: The direct cost of drug resistance (ESPERA study). *Seizure* 2014;23:349-56.
82. Linde M, Gustavsson A, Stovner LJ, et al. The cost of headache disorders in Europe: the EuroLight project. *European Journal of Neurology* 2012;19:703-43.
83. Ulrich S, Holle R, Wacker M, et al. Cost burden of type 2 diabetes in Germany: results from the population-based KORA studies. *BMJ Open* 2016 doi: 012527
84. Gesundheitsberichterstattung des Bundes. Cost of illness in millions of Euro for Germany. [http://www.gbe-bund.de/oowa921-install/servlet/oowa/aw92/WS0100/\\_XWD\\_PROC?\\_XWD\\_406/4/XWD\\_CUBE.DRILL/\\_XWD\\_434/D.946/14497](http://www.gbe-bund.de/oowa921-install/servlet/oowa/aw92/WS0100/_XWD_PROC?_XWD_406/4/XWD_CUBE.DRILL/_XWD_434/D.946/14497) (accessed 27/02/2018).
85. Syriopoulou V, Kafetzis D, Theodoridou M, et al. Evaluation of potential medical and economic benefits of universal rotavirus vaccination in Greece *Acta Paediatrica* 2011;100:732-39.
86. Athanaskis K, Ollandezos M, Angeli A, et al. Estimating the direct cost of type 2 diabetes in Greece: the effects of blood glucose regulation on patient cost. *Diabetic Medicine* 2012;27:679-84.
87. Statistics Iceland. Statistical Yearbook of Iceland. [http://issuu.com/hagstofa/docs/landshagir2012\\_lowres?e=7193385/5082887](http://issuu.com/hagstofa/docs/landshagir2012_lowres?e=7193385/5082887) (accessed 04/07/2018).
88. Sigurgeirsdottir S, Waagfjoro J, Maresso A. Iceland: Health System Review. *WHO Health Syst Transit* 2014;16:1-182.
89. The Economic and Social Research Institute. Economic Evaluation of Palliative Care in Ireland (2015). <https://www.esri.ie/publications/economic-evaluation-of-palliative-care-in-ireland-economic-evaluation-of-palliative-care-in-ireland/> (accessed 01/05/2018).
90. Morgan RB, McCullagh L, Dally BC. The cost of inpatient management of heart failure patients: a microcosting study in the Irish healthcare setting. *Irish Journal of Medical Science* 2017;186:293-303.
91. Ginsberg GM, Block C, Stein-Zamir C. Cost-utility analysis of a nationwide vaccination programme against serogroup B meningococcal disease in Israel. *International Journal of Public Health* 2016;61:683-92.
92. Lithuanian Ministry of Health. Health Statistics of Lithuania 2015. <http://sic.hi.lt/data/la2015.pdf> (accessed 09/05/2018).

93. Caisse Nationale de Sante. Version Coordonnee au 01.01.2018 de la nomenclature des actes et services des medecins, medecins-dentistes et tarifs applicables. <http://cns.public.lu/content/dam/cns/legislations/texte-coordonne/livre-bleu/livre-bleu-01012018.pdf> (accessed 07/06/2018).
94. Polinder S, Toet H, Mulder S, et al. APOLLO: The economic consequences of injury. <http://www.euroipn.org/apollo/reports/WP2.1Annex%2012%20Final%20report%20on%20The%20economic%20consequences%20of%20injury,%2006%20October%202008.pdf> (accessed 07/06/2018).
95. Buisman LR, Tan SS, Kodstaal PJ, et al. Hospital costs of ischemic stroke and TIA in the Netherlands. *Neurology* 2015;84:2208-15.
96. Werner EL, Storheim K, Lochting I, et al. Cognitive patient education for low back pain in primary care: a cluster randomized controlled trial and cost-effectiveness analysis. *Spine* 2016;41:455-62.
97. Statistics Norway. Health expenditure by source of funding, function of care, contents and year. <https://www.ssb.no/en/statbank/table/10811/tableViewLayout1/> (accessed 04/07/2018).
98. Kobelt G, Eriksson J, Phillips G, et al. The burden of multiple sclerosis 2015: Methods of data collection, assessment and analysis of costs, quality of life and symptoms. *Multiple Sclerosis Journal* 2017;23:4-16.
99. Wyoscki J, Malecka I, Stryczynska-Kazubska J, et al. Varicella in Poland: economic burden in children 1-12 years of age in Poland 2010-2015. *BMC Public Health* 2018;18:410.
100. Portaria N. 234/2015. Diario da Republica N. 153/2015, Serie I de 2015-08-07. <https://dre.pt/application/file/69965783> (accessed 12/06/2018).
101. Ministerio da Saude. Base de Dados dos Elementos Analiticos (BDEA). <http://www2.acss.min-saude.pt/bdea/> (accessed 11/06/2018).
102. World Health Organization. Country-specific unit costs. [http://www.who.int/choice/country/country\\_specific/en/](http://www.who.int/choice/country/country_specific/en/) (accessed 12/06/2018).
103. Generalitat de Catalunya. SLT/30/2013, de 20 de febrer, per la qual s'aproven els preus públics del Servei Català de la Salut. <http://portaldogc.gencat.cat/utillsEADOP/PDF/6323/1286874.pdf> (accessed 27/02/2018).
104. Ministerio de Sanidad SSEL. Diagnósticos Principales. <http://pestadistico.inteligenciadegestion.msssi.es/publicoSNS/comun/ArbolNodos.aspx?idNodo=6386> (accessed 27/02/2018).
105. Sveriges Kommuner och Landsting. Statistik om hälso- och sjukvård samt regional utveckling 2016. <https://skl.se/download/18.2ec0a40816106217d5cb1641/1516799268845/Statistik-om%20halso-och%20sjukv%C3%A5rd-samt-%20regional-utveckling-2016.pptx> (accessed 19/06/2018).
106. Wieser S, Ruthemann I, De Boni S, et al. Cost of acute coronary syndrome in Switzerland in 2008. *Swiss Medical Weekly* 2012;142:w13655.
107. Personal Social Services Research Unit. Unit costs of health and social care. <https://www.pssru.ac.uk/project-pages/unit-costs/> (accessed 19/06/2018).
108. NHS Improvement. Reference costs. <https://improvement.nhs.uk/resources/reference-costs/>
109. Paris V, Renaud T, Sermet C. Des comptes de la sante par pathologie: un prototype pour l'annee 1998. <http://www.irdes.fr/Publications/Rapports2003/rap1480.pdf>. (accessed 27/03/2018).
110. Centraal Bureau voor de Statistiek. Kosten van Zietken 2015. <https://statline.rivm.nl/#/RIVM/nl/dataset/50040NED/table?graphtype=Table&ts=1512975518824> (accessed 07/06/2018).
111. European Commission. Bulgaria: Health Care & Long-term Care Systems. [https://ec.europa.eu/info/sites/info/files/file\\_import/joint-report\\_bg\\_en\\_2.pdf](https://ec.europa.eu/info/sites/info/files/file_import/joint-report_bg_en_2.pdf) (accessed 12/09/2018).
112. European Commission. Cyprus: Health Care & Long-term Care Systems. [https://ec.europa.eu/info/sites/info/files/file\\_import/joint-report\\_cy\\_en\\_2.pdf](https://ec.europa.eu/info/sites/info/files/file_import/joint-report_cy_en_2.pdf) (accessed 10/09/2018).
113. European Commission. Italy: Health Care & Long-term Care Systems. [https://ec.europa.eu/info/sites/info/files/file\\_import/joint-report\\_it\\_en\\_2.pdf](https://ec.europa.eu/info/sites/info/files/file_import/joint-report_it_en_2.pdf) (accessed 24/09/2018).
114. European Commission. Latvia: Health Care & Long-term Care Systems. [https://ec.europa.eu/info/sites/info/files/file\\_import/joint-report\\_lv\\_en\\_2.pdf](https://ec.europa.eu/info/sites/info/files/file_import/joint-report_lv_en_2.pdf) (accessed 24/09/2018).

115. European Commission. Lithuania: Health Care & Long-term Care Systems. [https://ec.europa.eu/info/sites/info/files/file\\_import/joint-report\\_lt\\_en\\_2.pdf](https://ec.europa.eu/info/sites/info/files/file_import/joint-report_lt_en_2.pdf) (accessed 24/09/2018).
116. European Commission. Malta: Health Care & Long-term Care Systems. [https://ec.europa.eu/info/sites/info/files/file\\_import/joint-report\\_mt\\_en\\_2.pdf](https://ec.europa.eu/info/sites/info/files/file_import/joint-report_mt_en_2.pdf) (accessed 24/09/2018).
117. European Commission. Poland: Health Care & Long-term Care Systems. [https://ec.europa.eu/info/sites/info/files/file\\_import/joint-report\\_pl\\_en\\_2.pdf](https://ec.europa.eu/info/sites/info/files/file_import/joint-report_pl_en_2.pdf) (accessed 09/01/2019).
118. Leichhsering K. Long-term care in Austria. [http://www.imserso.es/InterPresent2/groups/imserso/documents/binario/007\\_cuidadosldkleichsenring\\_in.pdf](http://www.imserso.es/InterPresent2/groups/imserso/documents/binario/007_cuidadosldkleichsenring_in.pdf) (accessed 13/08/2018).
119. IMSERSO. Informe 2006: Las personas mayores en Espana. <http://envejecimiento.csic.es/documentos/documentos/imserso-informe-personas-mayores-vol1-2006.pdf> (accessed 17/09/2018).
120. Statistics Austria. Statistisches Jahrbuch Österreichs. . [http://www.statistik.at/web\\_en/publications\\_services/statistisches\\_jahrbuch/index.html](http://www.statistik.at/web_en/publications_services/statistisches_jahrbuch/index.html) (accessed 11/10/2016).
121. European Commission. Greece: Health Care & Long-term Care Systems. [https://ec.europa.eu/info/sites/info/files/file\\_import/joint-report\\_el\\_en\\_2.pdf](https://ec.europa.eu/info/sites/info/files/file_import/joint-report_el_en_2.pdf) (accessed 12/09/2018).
122. European Commission. Hungary: Health Care & Long-term Care Systems. [https://ec.europa.eu/info/sites/info/files/file\\_import/joint-report\\_hu\\_en\\_2.pdf](https://ec.europa.eu/info/sites/info/files/file_import/joint-report_hu_en_2.pdf) (accessed 17/09/2018).
123. European Commission. Slovenia: Health Care & Long-term Care Systems. [https://ec.europa.eu/info/sites/info/files/file\\_import/joint-report\\_si\\_en\\_2.pdf](https://ec.europa.eu/info/sites/info/files/file_import/joint-report_si_en_2.pdf) (accessed 09/01/2019).
124. Mayer S, Kiss N, Laszewska A, et al. Costing evidence for health care decision-making in Austria: A systematic review. *Plos ONE* 2017;12 doi: 10.1371/journal.pone.0183116.
125. INAMI. INAMI. Note conceptuelle relative aux soins alternatifs et de soutien aux soins a des personnes agees fragiles. <https://www.riziv.fgov.be/SiteCollectionDocuments/note-alternatifs-soins-personnes-agees.docx> (accessed 13/08/2018).
126. Badun M. Financiranje domova za starije I menocne osobe u Hrvatskoj *Rev soc polit god* 2017;24:19-43.
127. Maresova P, Zahalkova V. The economic burden of the care and treatment for people with Alzheimer's disease: the outlook for the Czech Republic. *Neurol Sci* 2016;37:1917-22.
128. Sortso C, Green.A., Jensen PB, et al. Societal costs of diabetes mellitus in Denmark. *Diabetic Medicine* 2016;33:877-85.
129. Jurisson M, Pisarev H, Kanis J, et al. Quality of life, resource use, and costs related to hip fracture in Estonia. *Osteoporos Int* 2016;27(2555-2566)
130. Statistical Information on welfare and health in Finland. Ageing and functional capacity. <https://sotkanet.fi/sotkanet/en/haku?g=358> (accessed 12/09/2018).
131. Reed C, Happich M, Argimon JM, et al. What drives country differences in cost of Alzheimer's disease? An explanation from resource use in the GERAS study. *Journal of Alzheimer's Disease* 2017;57:797-812.
132. Statistics Iceland. Total expenditure on social protection, further details 2006-2013. [http://px.hagstofa.is/pxen/pxweb/en/Samfelag/Samfelag\\_\\_felagsmal\\_\\_utgjold\\_felagsvernd/HEI01002.px](http://px.hagstofa.is/pxen/pxweb/en/Samfelag/Samfelag__felagsmal__utgjold_felagsvernd/HEI01002.px) (accessed 24/09/2018).
133. Brick A, Smith S, Normand C, et al. Costs of formal and informal care in the last year of life for patients in receipt of specialist palliative care. *Palliative Medicine* 2017;31:356-68.
134. Brammli-Greenberg S, Waitzberg R, Gross R. Private long-term care insurance in Israel. <https://brookdale.jdc.org.il/en/publication/private-long-term-care-insurance-israel/> (accessed 04/09/2018).
135. MacNeil Vroomen J, Bosmans.J.E., Eekhout I, et al. The cost-effectiveness of two forms of case management compared to a control group for persons with dementia and their informal caregivers from a societal perspective. *Plos ONE* 2016;11 doi: 10.1371/journal.pone.0160908
136. Hektoen LF, Saltvedt I, Sletvold O, et al. One-year health and care costs after hip fracture for home-dwelling elderly patients in Norway: Results from the Trondheim Hip Fracture Trial. *Scand J Public Health* 2016;44:791-98.

137. Caravau H, Martin I. Direct costs of dementia in nursing homes. *Frontiers in Aging Neuroscience* 2015;7:146.
138. European Network of Economic Policy Research Institutes. Long-term care in Romania. <https://www.files.ethz.ch/isn/122417/Romania.pdf> (accessed 02/04/2019).
139. Soto-Gordoa M, Arrospide A, Zpiain A, et al. El coste de la aplicación de la ley de dependencia a la enfermedad de Alzheimer. *Gac Sanit* 28:389-92.
140. Akerborg O, Lang A, Wimo A, et al. Cost of dementia and its correlation with dependence. *Journal of Aging and Health* 2016;28:1448-64.
141. Kraft E, Marti M, Werner S, et al. Cost of dementia in Switzerland. *Swiss Med Wkly* 2010;140:w13093.
142. Institute of Health Metrics. Global Burden of Disease. <http://www.healthdata.org/gbd> (accessed 14/05/2019).
143. World Health Organization. Cause of Death Query Online. [http://apps.who.int/healthinfo/statistics/mortality/causeofdeath\\_query/](http://apps.who.int/healthinfo/statistics/mortality/causeofdeath_query/) (accessed 03/09/2018).
144. Central Bureau of Statistics. Employed persons by industry, age, population group and sex. [http://www.cbs.gov.il/publications17/lfs15\\_1684/pdf/t02\\_03.pdf](http://www.cbs.gov.il/publications17/lfs15_1684/pdf/t02_03.pdf) (accessed 03/09/2018).
145. International Labour Organization. Key Indicators of the Labour Market. [https://www.ilo.org/ilostat/faces/wcnav\\_defaultSelection?\\_afLoop=609972699080347&\\_afWindowMode=0&\\_afWindowId=nhv4sik25\\_1#!%40%40%3F\\_afWindowId%3Dnhv4sik25\\_1%26\\_afLoop%3D609972699080347%26\\_afWindowMode%3D0%26\\_adf.ctrl-state%3Dnhv4sik25\\_87](https://www.ilo.org/ilostat/faces/wcnav_defaultSelection?_afLoop=609972699080347&_afWindowMode=0&_afWindowId=nhv4sik25_1#!%40%40%3F_afWindowId%3Dnhv4sik25_1%26_afLoop%3D609972699080347%26_afWindowMode%3D0%26_adf.ctrl-state%3Dnhv4sik25_87) (accessed 03/09/2018).
146. Hellenic Statistical Authority. Statistical Yearbook of Greece. [http://dlib.statistics.gr/Book/GRESYE\\_01\\_0002\\_00061.pdf](http://dlib.statistics.gr/Book/GRESYE_01_0002_00061.pdf) (accessed 27/03/2018).
147. Český statistický úřad. Ukončené případy pracovní neschopnosti pro nemoc a úraz. [www.uzis.cz/katalog/zdravotnicka-statistika/ukoncene-pripady-pracovni-neschopnosti-pro-nemoc-uraz](http://www.uzis.cz/katalog/zdravotnicka-statistika/ukoncene-pripady-pracovni-neschopnosti-pro-nemoc-uraz) (accessed 01/03/2018).
148. Vahtera J, Westerlund H, Ferrie JE, et al. All-cause and diagnosis-specific sickness absence as a predictor of sustained suboptimal health: a 14-year follow-up in the GAZEL cohort. *J Epidemiol Community Health* 2010;64:311-17.
149. Gesundheitsberichterstattung des Bundes. Inability to work of compulsory members of the Local Statutory Health Insurance (AOK) without pensioners (cases and days of inability to work, days of inability to work per 100,000 compulsory members, days per case). [www.gbe-bund.de/oowa921-install/servlet/oowa/aw92/WS0100/\\_XWD\\_PROC?\\_XWD\\_406/1/XWD\\_CUBE.DRILL/\\_XWD\\_434/D.946/14497](http://www.gbe-bund.de/oowa921-install/servlet/oowa/aw92/WS0100/_XWD_PROC?_XWD_406/1/XWD_CUBE.DRILL/_XWD_434/D.946/14497) (accessed 27/02/2018).
150. Office for National Statistics. Sickness absence in the labour market. <https://www.ons.gov.uk/employmentandlabourmarket/peopleinwork/employmentandemployee/types/datasets/sicknessabsenceinthelabourmarket> (accessed 19/06/2018).
151. INAMI. Absentéisme pour maladie en incapacité primaire de travail. <http://www.riziv.fgov.be/SiteCollectionDocuments/absenteisme-incapacite-primaire.pdf> (accessed 09/01/2018).
152. Barbini N, Beretta GG, Minnucci MP, et al. Le principali patologie causa di assenza dal lavoro. Analisi della banca dati INPS. *G Ital Med Lav Erg* 2006;28:14-19.
153. Ministère de la Sécurité Sociale. L'absentéisme pour cause de maladie en 2010. [http://www.observatoire-absenteisme.public.lu/chiffres\\_cles/Absenteisme\\_maladie\\_2010.pdf](http://www.observatoire-absenteisme.public.lu/chiffres_cles/Absenteisme_maladie_2010.pdf) (accessed [http://www.observatoire-absenteisme.public.lu/chiffres\\_cles/Absenteisme\\_maladie\\_2010.pdf](http://www.observatoire-absenteisme.public.lu/chiffres_cles/Absenteisme_maladie_2010.pdf)).
154. TNO Innovation for Life. Nationale Enquête Arbeidsomstandigheden 2015. <http://www.monitorarbeid.tno.nl/publicaties/nea-2015> (accessed 27/02/2018).
155. Gjesdal S, Bratberg E. Diagnosis and duration of sickness absence as predictors for disability pension: Results from a three-year, multi-register based and prospective study. *Scand J Public Health* 2003;31:246-54.
156. Dane Publiczne. Absencja chorobowa - dane za 2016 r. <https://danepubliczne.gov.pl/pl/dataset/absencja-chorobowa-2016-r> (accessed 10/04/2018).
157. Oliva J. Perdidas laborales ocasionadas por las enfermedades y problemas de salud en España en el año 2005. [http://www.ief.es/documentos/recursos/publicaciones/papeles\\_trabajo/2010\\_05.pdf](http://www.ief.es/documentos/recursos/publicaciones/papeles_trabajo/2010_05.pdf) (accessed 28/02/2018).

158. Kansaneläkelaitos - The Social Insurance. Statistics on the pensions provided by Kela. [http://www.kela.fi/web/en/statistical-database-kelasto\\_contents#Pensions](http://www.kela.fi/web/en/statistical-database-kelasto_contents#Pensions) (accessed 02/03/2018).
159. Lidwall U. Long-term sickness absence: Aspects of Society, Work and Family. Karolinska Institutet, 2010.
160. INAMI. Nombre de jours et montants des indemnités en incapacité primaire- Évolution et ventilation par état social et par sexe. [http://www.riziv.fgov.be/SiteCollectionDocuments/stat\\_si2014\\_2.pdf](http://www.riziv.fgov.be/SiteCollectionDocuments/stat_si2014_2.pdf) (accessed 09/01/2018).
161. INAMI. Nombre de salariés et chômeurs en invalidité - Évolution 2010-2014 et ventilation par état social, par sexe, par âge. . [http://www.riziv.fgov.be/SiteCollectionDocuments/stat\\_si2014\\_1\\_invalidite.pdf](http://www.riziv.fgov.be/SiteCollectionDocuments/stat_si2014_1_invalidite.pdf) (accessed 09/01/2018).
162. European Observatory of Working Life. Absence from work – Bulgaria. <http://www.eurofound.europa.eu/observatories/eurwork/comparative-information/national-contributions/bulgaria/absence-from-work-bulgaria> (accessed 09/01/2018).
163. European Observatory of Working Life. Absence from work - Romania. <http://www.eurofound.europa.eu/observatories/eurwork/comparative-information/national-contributions/romania/absence-from-work-romania> (accessed 12/06/2018).
164. Marchena Aparicio JC, O'Ferrall Gonzalez C, Ares Camerino A, et al. La incapacidad permanente en una empresa publica en el periodo 1995-2009. *Medicina y Seguridad del Trabajo* 2011;57:224.
165. Statistics Denmark. Absence by occupation, cause of absence, sex, sector, time and indicator of absence. [www.statbank.dk/statbank5a/default.asp?w=1607](http://www.statbank.dk/statbank5a/default.asp?w=1607) (accessed 02/03/2018).
166. Statistics Denmark. Persons receiving public benefits by type of benefits and time. [www.statbank.dk/statbank5a/default.asp?w=1607](http://www.statbank.dk/statbank5a/default.asp?w=1607) (accessed 02/03/2018).
167. Statistics Estonia. Persons receiving disability pension/pension for incapacity for work. <http://pub.stat.ee/px-web.2001/Dialog/Saveshow.asp> (accessed 02/03/2018).
168. Kansaneläkelaitos - The Social Insurance. Statistics on sickness allowance. [http://www.kela.fi/web/en/statistical-database-kelasto\\_contents#Sickness](http://www.kela.fi/web/en/statistical-database-kelasto_contents#Sickness) (accessed 02/03/2018).
169. Cuerq A, Païta M, Ricordeau P. Les causes medicales de l'invalidite. [http://www.handipole.org/IMG/pdf/Points\\_de\\_repere\\_n\\_\\_16.pdf](http://www.handipole.org/IMG/pdf/Points_de_repere_n__16.pdf) (accessed 25/11/2016).
170. Gesundheitsberichterstattung des Bundes. Inability to work: days and cases of inability to work of the members of the Statutory Health Insurance (number and rate). [www.gbe-bund.de/oowa921-install/servlet/oowa/aw92/WS0100/\\_XWD\\_FORMPROC?TARGET=&PAGE=\\_XWD\\_804&OPI\\_NDEX=1&HANDLER=XS\\_ROTATE\\_ADVANCED&DATACUBE=\\_XWD\\_832&D.000=ACROSS&D.003=PAGE&D.008=PAGE&D.009=PAGE&D.100=DOWN](http://www.gbe-bund.de/oowa921-install/servlet/oowa/aw92/WS0100/_XWD_FORMPROC?TARGET=&PAGE=_XWD_804&OPI_NDEX=1&HANDLER=XS_ROTATE_ADVANCED&DATACUBE=_XWD_832&D.000=ACROSS&D.003=PAGE&D.008=PAGE&D.009=PAGE&D.100=DOWN) (accessed 27/02/2018).
171. Gesundheitsberichterstattung des Bundes. Pensions due to disability ("verminderte Erwerbsfähigkeit") in the statutory pension insurance (number total or per 100,000 actively insured persons). [http://www.gbe-bund.de/oowa921-install/servlet/oowa/aw92/dboowasys921.xwdevkit/xwd\\_init?gbe.isgbetol/xs\\_start\\_neu/&p\\_aid=3&p\\_aid=11006808&nummer=369&p\\_sprache=E&p\\_indsp=-&p\\_aid=32100044](http://www.gbe-bund.de/oowa921-install/servlet/oowa/aw92/dboowasys921.xwdevkit/xwd_init?gbe.isgbetol/xs_start_neu/&p_aid=3&p_aid=11006808&nummer=369&p_sprache=E&p_indsp=-&p_aid=32100044) (accessed 28/02/2018).
172. Gesundheitsberichterstattung des Bundes. Lost workforce years in 1,000 years for Germany. [www.gbe-bund.de/oowa921-install/servlet/oowa/aw92/WS0100/\\_XWD\\_PROC?\\_XWD\\_1212/1/XWD\\_CUBE.DRILL/\\_XWD\\_1240/D.946/14497](http://www.gbe-bund.de/oowa921-install/servlet/oowa/aw92/WS0100/_XWD_PROC?_XWD_1212/1/XWD_CUBE.DRILL/_XWD_1240/D.946/14497) (accessed 28/02/2018).
173. Hungarian Central Statistical Office. Sick Pay. <http://statinfo.ksh.hu/Statinfo/haDetails.jsp?query=kshquery&lang=en> (accessed 27/03/2018).
174. Hungarian Central Statistical Office. Pensions, benefits, annuities and other provisions. <http://statinfo.ksh.hu/Statinfo/haDetails.jsp>
175. Statistics Iceland. Benefits and recipients of social security benefits 1994-2016. [http://px.hagstofa.is/pxen/pxweb/en/Samfelag/Samfelag\\_felagsmal\\_tryggingar/HEI03101.px/table/tableViewLayout1/?rxid=cc79ea20-1fbd-44d8-bd04-c58a3767cd88](http://px.hagstofa.is/pxen/pxweb/en/Samfelag/Samfelag_felagsmal_tryggingar/HEI03101.px/table/tableViewLayout1/?rxid=cc79ea20-1fbd-44d8-bd04-c58a3767cd88) (accessed 04/07/2018).
176. Central Statistics Office. Statbank. <http://www.cso.ie/px/pxeirestat/statire/SelectTable/Omrade0.asp?Planguage=0> (accessed 01/05/2018).

177. Department of Social Protection. Annual SWS Statistical Information Report 2016. [https://www.welfare.ie/en/pdf/DEASP\\_Annual\\_Statistics\\_Report\\_2016.pdf](https://www.welfare.ie/en/pdf/DEASP_Annual_Statistics_Report_2016.pdf) (accessed 01/05/2018).
178. Department for Works and Pensions. Welcome to Stat-Xplore. <https://stat-xplore.dwp.gov.uk/webapi/jsf/dataCatalogueExplorer.xhtml> (accessed 19/06/2018).
179. OECD. Draft reform of the Israeli disability pension system: an initial assessment by the OECD. <https://www.oecd.org/israel/Israel-disability-pension-note-July-2017.pdf> (accessed 04/09/2018).
180. Fit for Work Italia. Fit for Work Italia: malattie reumatiche croniche invalidanti, tra salute e lavoro. Le istanze della coalizione Fit for Work Italia alle Istituzioni. <http://www.reumatologia.it/obj/files/dossier.pdf> (accessed 21/05/2018).
181. European Observatory of Working Life. Absence from work – Italy. <http://eurofound.europa.eu/observatories/eurwork/comparative-information/national-contributions/italy/absence-from-work-italy> (accessed 21/05/2018).
182. Italian National Institute of Statistics. I.Stat. <http://dati.istat.it/Index.aspx> (accessed 21/05/2018).
183. European Observatory of Working Life. Absence from work – Latvia. <http://www.eurofound.europa.eu/observatories/eurwork/comparative-information/national-contributions/latvia/absence-from-work-latvia> (accessed 01/05/2018).
184. Central Statistical Bureau of Latvia. Number of pension and state social security benefit recipients at end of year (thsd population). [http://data.csb.gov.lv/pxweb/en/Sociala/Sociala\\_\\_ikgad\\_socdr/SD0010.px/table/tableViewLayout2/?rxid=562c2205-ba57-4130-b63a-6991f49ab6fe](http://data.csb.gov.lv/pxweb/en/Sociala/Sociala__ikgad_socdr/SD0010.px/table/tableViewLayout2/?rxid=562c2205-ba57-4130-b63a-6991f49ab6fe) (accessed 01/05/2018).
185. Lietuvos Statistikos Departamentas. Social Security. [https://osp.stat.gov.lt/documents/10180/3329771/Social\\_security.pdf](https://osp.stat.gov.lt/documents/10180/3329771/Social_security.pdf) (accessed 09/05/2018).
186. Ministère de la Sécurité Sociale. L'absentéisme pour cause de maladie en 2016. [http://www.mss.public.lu/publications/Apercus\\_et\\_cahiers/apercus/cahier\\_apercu\\_201709.pdf](http://www.mss.public.lu/publications/Apercus_et_cahiers/apercus/cahier_apercu_201709.pdf) (accessed 07/06/2018).
187. TNO Innovation for Life. Nationale Enquête Arbeidsomstandigheden 2016. [http://www.monitorarbeid.tno.nl/dynamics/modules/SPUB0102/view.php?pub\\_Id=100474&att\\_Id=4911](http://www.monitorarbeid.tno.nl/dynamics/modules/SPUB0102/view.php?pub_Id=100474&att_Id=4911) (accessed 27/02/2018).
188. Centraal Bureau voor de Statistiek. Social security; key figures, number of benefits. <https://opendata.cbs.nl/statline/#/CBS/en/dataset/37789eng/table?ts=1519741743482> (accessed 27/02/2018).
189. Statistics Norway. Recipients of disability benefit. <https://www.ssb.no/en/sosiale-forhold-og-kriminalitet/statistikker/ufore> (accessed 04/07/2018).
190. Gabinete de Estrategia e Planeamento. Balanço Social 2016. <http://www.gepmsessgovpt/estatistica/indexhtml> (accessed 11/06/2018).
191. Segurança Social. Estatísticas: Pensoes de Invalidez Velhice e Sobrevivencia. <http://www.wseg-socialpt/estatisticas> (accessed 11/06/2018).
192. Štatisický Úrad Slovenskej Republiky. DATAcube. <http://datacube.statistics.sk/> (accessed 25/06/2018).
193. Republic of Slovenia Statistical Office. Expenditure and receipts of social protection schemes and pension beneficiaries, detailed data, Slovenia, 2014. <http://www.stat.si/StatWeb/en/show-news?id=6105&idp=21&headerbar=17> (accessed 10/01/2017).
194. Ministerio de Empleo y Seguridad Social. Incapacidad permanente. [http://www.seg-social.es/Internet\\_1/Estadistica/Est/Pensiones\\_y\\_pensionistas/Pensiones\\_contributivas\\_en\\_vigor/Incapacidad\\_permanente/index.htm](http://www.seg-social.es/Internet_1/Estadistica/Est/Pensiones_y_pensionistas/Pensiones_contributivas_en_vigor/Incapacidad_permanente/index.htm) (accessed 27/02/2018).
195. Statistics Sweden. Number of sick periods distributed by sector and sex. <http://www.scb.se/en/finding-statistics/statistics-by-subject-area/labour-market/sick-pay/short-term-business-statistics-on-sick-pay/pong/tables-and-graphs/number-of-sick-periods-distributed-by-sector-and-sex/> (accessed 19/06/2018).
196. Office Fédéral de la Statistique. Absences. <https://www.bfs.admin.ch/bfs/fr/home/statistiques/travail-remuneration/activite-professionnelle-temps-travail/temps-travail/absences.html> (accessed 04/08/2018).
197. Office Fédéral de la Statistique. Beneficiaries and benefits. <https://www.bfs.admin.ch/bfs/fr/home/statistiques/securite-sociale/prevoyance-professionnelle/beneficiaires-prestations.html> (accessed 04/08/2018).
198. Koopmanschap M, van Ineveld B. Towards a new approach for estimating indirect costs of disease. *Sco Sci Med* 1992;34:1005-10.



199. HM Treasury. The Green Book: appraisal and evaluation in central government.  
<https://www.gov.uk/government/publications/the-green-book-appraisal-and-evaluation-in-central-government> (accessed 15/05/2019).

## RESULTS

**Table A7.** Incidence and prevalence of stroke

|                     | <b>Incidence</b> | <b>Prevalence</b> |
|---------------------|------------------|-------------------|
| Austria             | 23,698           | 154,877           |
| Belgium             | 28,085           | 192,320           |
| Bulgaria            | 38,368           | 205,683           |
| Croatia             | 20,469           | 98,358            |
| Cyprus              | 1,573            | 11,079            |
| Czech Rep.          | 38,959           | 216,547           |
| Denmark             | 12,540           | 92,553            |
| Estonia             | 4,610            | 32,633            |
| Finland             | 17,429           | 133,952           |
| France              | 131,416          | 942,293           |
| Germany             | 242,497          | 1,685,144         |
| Greece              | 34,149           | 212,536           |
| Hungary             | 40,003           | 237,789           |
| Ireland             | 7,462            | 56,931            |
| Italy               | 166,015          | 778,199           |
| Latvia              | 12,188           | 68,840            |
| Lithuania           | 15,035           | 83,143            |
| Luxembourg          | 1,074            | 8,273             |
| Malta               | 892              | 6,646             |
| Netherlands         | 35,385           | 254,094           |
| Poland              | 124,540          | 690,591           |
| Portugal            | 27,447           | 191,120           |
| Romania             | 103,102          | 489,826           |
| Slovakia            | 20,560           | 103,365           |
| Slovenia            | 6,204            | 38,875            |
| Spain               | 101,845          | 550,941           |
| Sweden              | 24,807           | 166,065           |
| <b>Total EU-27</b>  | <b>1,280,353</b> | <b>7,702,671</b>  |
| UK                  | 134,979          | 992,413           |
| <b>Total EU-28</b>  | <b>1,415,332</b> | <b>8,695,085</b>  |
| Iceland             | 603              | 4,167             |
| Israel              | 11,390           | 82,396            |
| Norway              | 12,254           | 81,671            |
| Switzerland         | 19,766           | 135,329           |
| <b>Total Europe</b> | <b>1,459,345</b> | <b>8,998,648</b>  |

Source: Global Burden of Disease. Global Burden of Disease Tool. <http://ghdx.healthdata.org/gbd-results-tool>. Accessed 19 September 2019

**Figure A1.** Tornado plot of the results of the sensitivity analysis on the total costs of stroke, € millions

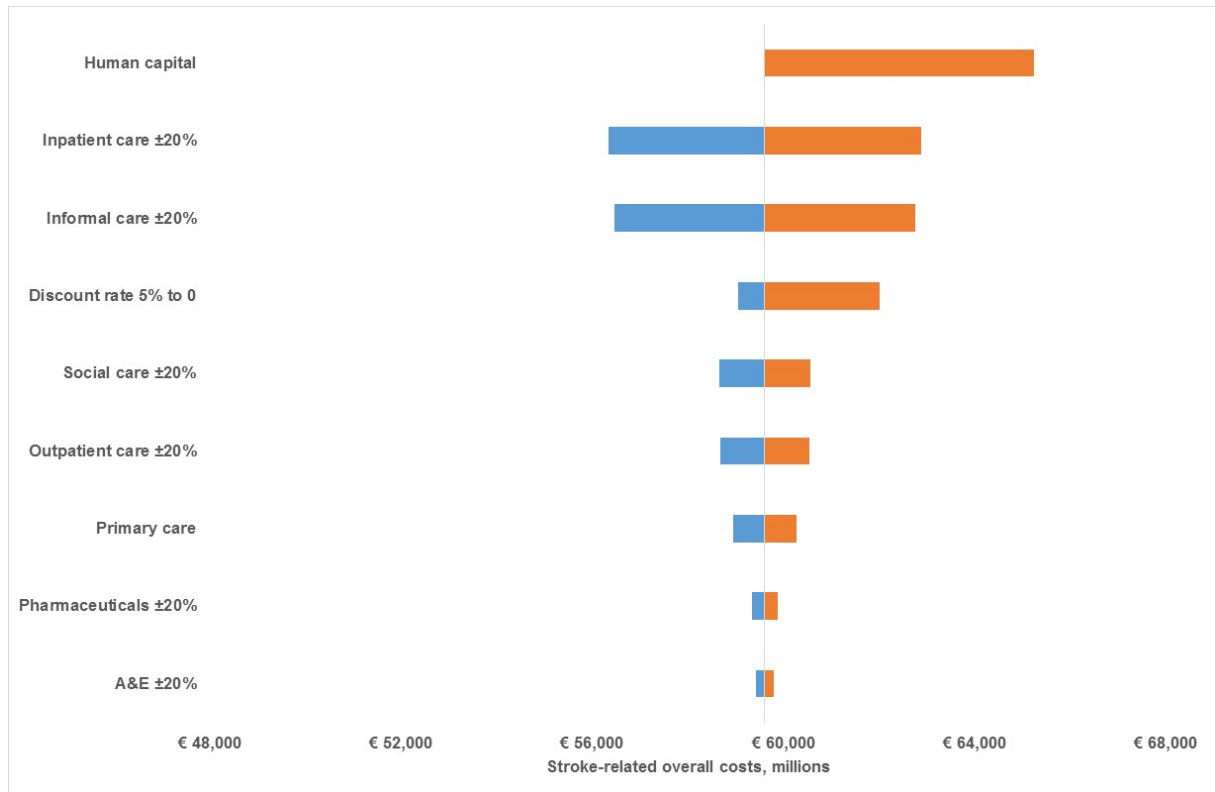

**Table A8.** Health and social care resource use, in thousands

|                     | <b>Number of<br/>GP visits</b> | <b>Number of<br/>outpatient<br/>visits</b> | <b>Number of<br/>emergency<br/>care visits</b> | <b>Days in<br/>hospital</b> | <b>Days in<br/>nursing<br/>home</b> |
|---------------------|--------------------------------|--------------------------------------------|------------------------------------------------|-----------------------------|-------------------------------------|
| Austria             | 2,841                          | 1,830                                      | 188                                            | 858                         | 784                                 |
| Belgium             | 1,367                          | 647                                        | 75                                             | 425                         | 4,439                               |
| Bulgaria            | 1,791                          | 486                                        | 55                                             | 329                         | 658                                 |
| Croatia             | 572                            | 411                                        | 30                                             | 196                         | 118                                 |
| Cyprus              | 36                             | 207                                        | 39                                             | 8                           | 26                                  |
| Czech Rep.          | 2,015                          | 3,899                                      | 37                                             | 1,071                       | 708                                 |
| Denmark             | 943                            | 224                                        | 43                                             | 74                          | 634                                 |
| Estonia             | 537                            | 289                                        | 43                                             | 123                         | 104                                 |
| Finland             | 123                            | 427                                        | 69                                             | 542                         | 677                                 |
| France              | 7,548                          | 2,747                                      | 954                                            | 1,624                       | 7,674                               |
| Germany             | 21,745                         | 17,403                                     | 252                                            | 7,381                       | 6,606                               |
| Greece              | 277                            | 227                                        | 241                                            | 438                         | 680                                 |
| Hungary             | 3,829                          | 5,414                                      | 49                                             | 1,164                       | 711                                 |
| Ireland             | 529                            | 189                                        | 84                                             | 123                         | 119                                 |
| Italy               | 11,118                         | 4,743                                      | 799                                            | 3,303                       | 2,841                               |
| Latvia              | 392                            | 209                                        | 27                                             | 141                         | 208                                 |
| Lithuania           | 1,140                          | 528                                        | 42                                             | 262                         | 545                                 |
| Luxembourg          | 40                             | 71                                         | 6                                              | 18                          | 93                                  |
| Malta               | 23                             | 17                                         | 5                                              | 18                          | 14                                  |
| Netherlands         | 2,578                          | 1,623                                      | 75                                             | 312                         | 1,071                               |
| Poland              | 7,082                          | 4,799                                      | 358                                            | 1,285                       | 905                                 |
| Portugal            | 1,188                          | 894                                        | 458                                            | 292                         | 493                                 |
| Romania             | 2,040                          | 4,413                                      | 51                                             | 920                         | 2,340                               |
| Slovakia            | 1,451                          | 2,358                                      | 85                                             | 280                         | 346                                 |
| Slovenia            | 392                            | 200                                        | 20                                             | 76                          | 139                                 |
| Spain               | 10,860                         | 2,584                                      | 960                                            | 797                         | 1,449                               |
| Sweden              | 748                            | 674                                        | 139                                            | 338                         | 1,095                               |
| <b>Total EU-27</b>  | <b>83,206</b>                  | <b>57,510</b>                              | <b>5,185</b>                                   | <b>22,397</b>               | <b>35,476</b>                       |
| UK                  | 11,666                         | 3,773                                      | 728                                            | 2,459                       | 5,651                               |
| <b>Total EU-28</b>  | <b>94,872</b>                  | <b>61,283</b>                              | <b>5,912</b>                                   | <b>24,855</b>               | <b>41,128</b>                       |
| Iceland             | 90                             | 46                                         | 4                                              | 8                           | 28                                  |
| Israel              | 1,644                          | 719                                        | 181                                            | 167                         | 192                                 |
| Norway              | 607                            | 298                                        | 50                                             | 154                         | 481                                 |
| Switzerland         | 461                            | 261                                        | 55                                             | 395                         | 1,339                               |
| <b>Total Europe</b> | <b>97,674</b>                  | <b>62,606</b>                              | <b>6,202</b>                                   | <b>25,581</b>               | <b>43,168</b>                       |

**Table A9.** Non-health and social care resource use, in thousands

|                     | Hours of informal care | Deaths     | Working years lost due to death | Working days lost due to illness |
|---------------------|------------------------|------------|---------------------------------|----------------------------------|
| Austria             | 22,215                 | 5          | 3                               | 920                              |
| Belgium             | 21,128                 | 7          | 3                               | 770                              |
| Bulgaria            | 40,133                 | 22         | 15                              | 193                              |
| Croatia             | 21,541                 | 7          | 3                               | 421                              |
| Cyprus              | 1,255                  | 0.4        | 0.3                             | 54                               |
| Czech Rep.          | 35,784                 | 10         | 7                               | 507                              |
| Denmark             | 5,099                  | 3          | 3                               | 297                              |
| Estonia             | 5,837                  | 1          | 1                               | 362                              |
| Finland             | 4,743                  | 4          | 2                               | 832                              |
| France              | 86,846                 | 32         | 19                              | 7,648                            |
| Germany             | 270,850                | 57         | 39                              | 5,191                            |
| Greece              | 21,982                 | 14         | 5                               | 889                              |
| Hungary             | 38,342                 | 13         | 9                               | 224                              |
| Ireland             | 4,726                  | 2          | 2                               | 507                              |
| Italy               | 169,878                | 62         | 21                              | 3,199                            |
| Latvia              | 12,571                 | 5          | 4                               | 299                              |
| Lithuania           | 14,738                 | 6          | 6                               | 620                              |
| Luxembourg          | 828                    | 0.2        | 0.1                             | 16                               |
| Malta               | 895                    | 0.3        | 0.2                             | 50                               |
| Netherlands         | 27,764                 | 10         | 7                               | 548                              |
| Poland              | 90,924                 | 30         | 33                              | 604                              |
| Portugal            | 44,808                 | 12         | 9                               | 905                              |
| Romania             | 90,407                 | 44         | 33                              | 405                              |
| Slovakia            | 17,075                 | 5          | 5                               | 359                              |
| Slovenia            | 5,071                  | 2          | 1                               | 111                              |
| Spain               | 110,152                | 28         | 13                              | 2,804                            |
| Sweden              | 9,301                  | 6          | 3                               | 568                              |
| <b>Total EU-27</b>  | <b>1,174,893</b>       | <b>389</b> | <b>245</b>                      | <b>29,303</b>                    |
| UK                  | 116,847                | 40         | 34                              | 5,705                            |
| <b>Total EU-28</b>  | <b>1,291,740</b>       | <b>429</b> | <b>279</b>                      | <b>35,008</b>                    |
| Iceland             | 158                    | 0.2        | 0.2                             | 22                               |
| Israel              | 10,272                 | 2          | 3                               | 1,551                            |
| Norway              | 2,922                  | 3          | 2                               | 1,149                            |
| Switzerland         | 6,157                  | 4          | 3                               | 267                              |
| <b>Total Europe</b> | <b>1,311,249</b>       | <b>438</b> | <b>286</b>                      | <b>37,997</b>                    |

**Figure A2.** Health and social care costs of stroke per person living with stroke across Europe in 2017, by care service category **A.** Not adjusted for price differentials. **B.** Adjusted for price differentials.

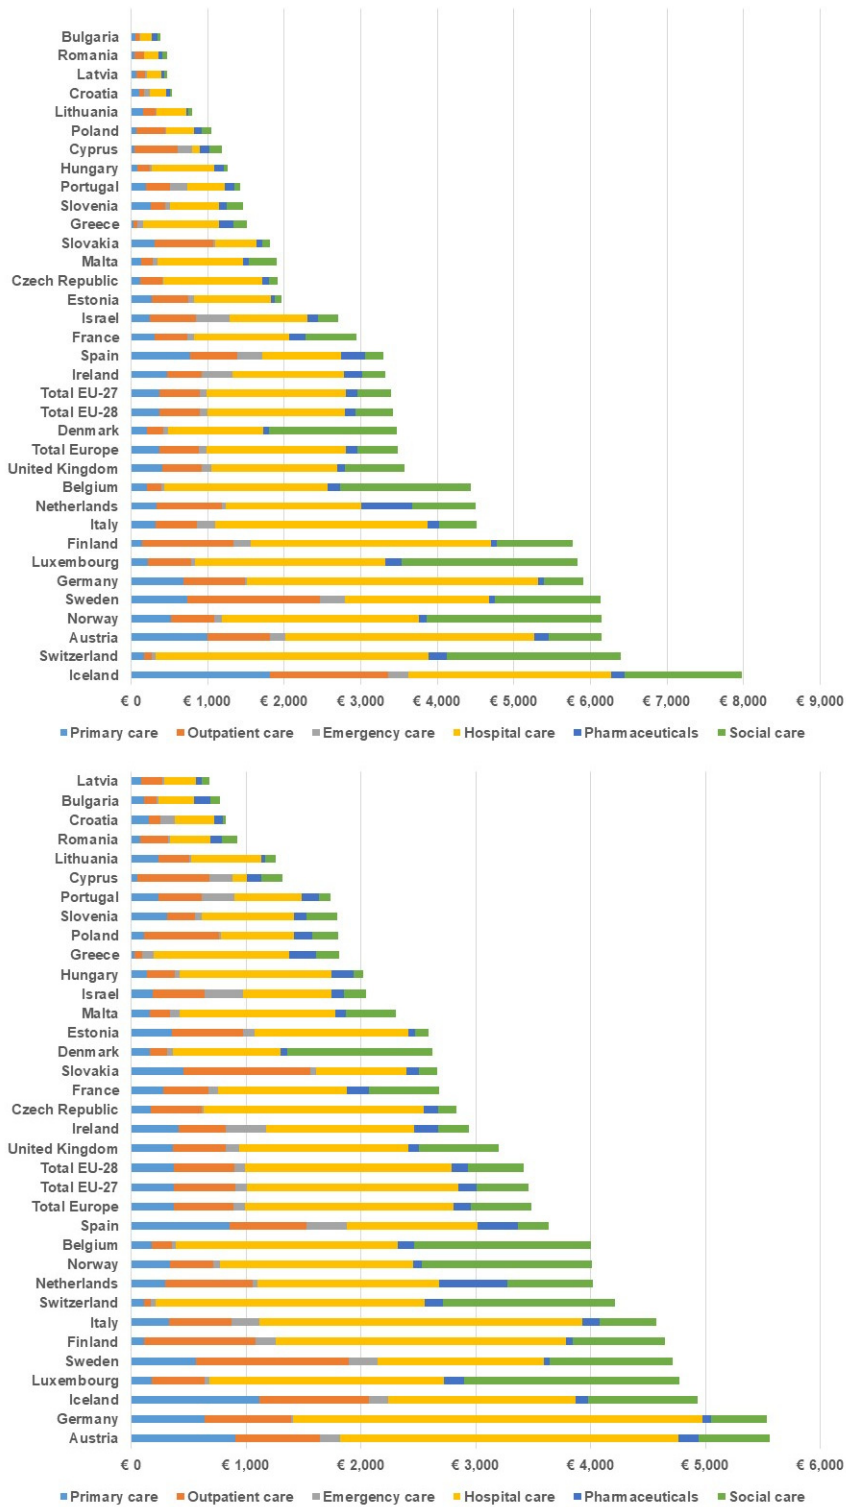

**Figure A3.** Correlation between stroke-related health and social care and health expenditure, €

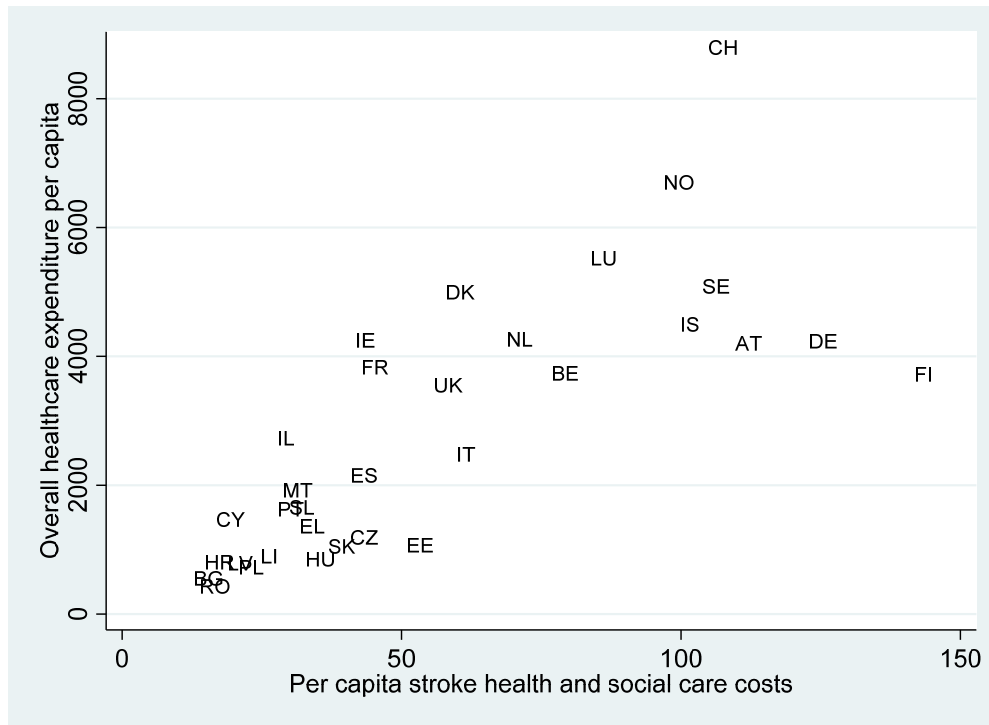

AT: Austria, BE: Belgium, BG: Bulgaria, HR: Croatia, CY: Cyprus, CZ: Czech Republic, DK: Denmark, EE: Estonia, FI: Finland, FR: France, DE: Germany, EL: Greece, HU: Hungary, IS: Iceland, IE: Ireland, IL: Israel, IT: Italy, LV: Latvia, LI: Lithuania, LU: Luxembourg, MT: Malta, NL: the Netherlands, NO: Norway, PL: Poland, PT: Portugal, RO: Romania, SK: Slovakia, SL: Slovenia, ES: Spain, SE: Sweden, CH: Switzerland, UK: United Kingdom

**Figure A4.** Average annual hours of informal care provided for stroke patients severely limited in daily activities

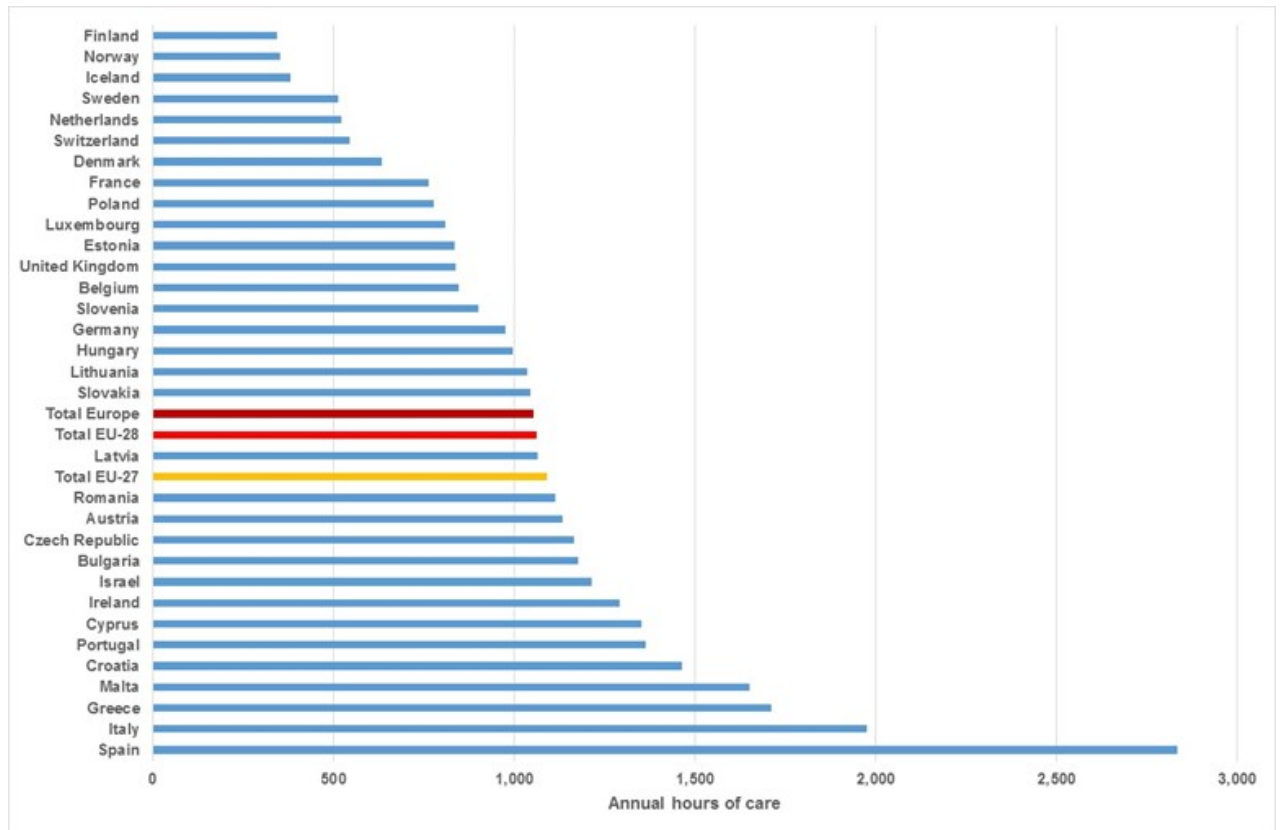

Supplement: ESO883160_Supplemental_Material.pdf [file ESO883160_Supplemental_Material.pdf]
